# Supplementary material for: Inhibition of striatonigral autophagy as a link between cannabinoid intoxication and impairment of motor coordination
Source: eLife. 2020 Aug 10;9:e56811. doi: 10.7554/eLife.56811 (PMC7417168; doi:10.7554/eLife.56811)
Supplement: Figure 1—source data 1. [file elife-56811-fig1-data1.xlsx]

## Sheet: Figure 1
Figure 1 - THC impairs autophagy in the mouse striatum
Figure 1A upper panel - Western blot analysis of the effect of THC on the autophagy markers LC3-I and LC3-II in different brain regions (optical density values)																																Figure 1A lower panel - Western blot analysis of the effect of THC on the autophagy markers LC3-II and p62 in different brain regions (optical density values)
Raw Data	Striatum				Cortex				Hippocampus				Cerebellum																			Raw Data	Striatum				Cortex				Hippocampus				Cerebellum
	LC3-I / β-actin		LC3-II / LC3-I		LC3-I / β-actin		LC3-II / LC3-I		LC3-I / β-actin		LC3-II / LC3-I		LC3-I / β-actin		LC3-II / LC3-I																		LC3-II / β-actin		p62 / β-actin		LC3-II / β-actin		p62 / β-actin		LC3-II / β-actin		p62 / β-actin		LC3-II / β-actin		p62 / β-actin
	Vehicle	THC	Vehicle	THC	Vehicle	THC	Vehicle	THC	Vehicle	THC	Vehicle	THC	Vehicle	THC	Vehicle	THC																	Vehicle	THC	Vehicle	THC	Vehicle	THC	Vehicle	THC	Vehicle	THC	Vehicle	THC	Vehicle	THC	Vehicle	THC
	0.947805	0.8518	1.15034	2.23777	1.0101	0.9926	0.9536	1.1168	0.9013	0.9135	1.1	0.7148	1.0429	0.9622	1.1474	1.0412																	1.061	1.569	0.883945	1.45596	0.931	1.094	1.099	1.04	0.839	1.069	1.063	0.91	1.059	0.850496	1.184	1.081
	1.0522	0.924	0.720659	2.61307	1	0.8637	0.9754	0.9763	1.112	1.1306	1.082	0.7707	0.9814	1.1477	1.035	0.9224																	0.86	1.623	1.24346	1.55162	1.264	0.796	0.961	0.91	1.201	1.134	0.981	0.826	0.841	0.598477	1.323	1.126
	1.151	0.8367	1.02084	1.6241	1.0008	1.0765	0.952	1.0668	1.0844	0.8029	1.01	1.0094	0.9443	0.9579	1.0874	0.9302																	1.508	2.125	0.986478	1.83425	0.74	0.755	1.083	1.026	0.907	1.13	0.916	1.078	1.029	0.662232	1.071	1.276
	0.9316	0.7265	0.950516	1.67289	0.9464	0.8969	1.2823	0.9628	1.003	0.966	1.0423	1.291	1.0758	0.9013	1.0644	1.2296																	0.673	1.472	0.950286	1.5114	0.847	0.982	0.989	0.938	1.004	0.985	0.775	0.787	1.201	1.36924	1.008	0.678
	0.9658	0.7429	1.15024	1.67147	1.0285	0.9258	0.87511	1.0032	1.1	0.9963	0.91	1.2862	1.0424	0.9933	0.8482	1.2074																	0.994	1.91	0.999426	1.27298	0.894	1.15	0.977	0.925	1.139	1.127	1.032	1.01	1.016	0.741146	0.714	0.729
	0.9515	1.08	1.01035	1.51031	1.0152	0.9467	0.97	0.9928	0.801495	1.1072	0.86	1.1557	0.9135	0.8856	0.8176	0.8033																	0.903	2.536	0.936404	1.91752	1.324	0.651	0.895	0.848	0.907	1.176	1.234	1.29	0.852	1.18082	0.7	0.773
Mean	1	0.8603	1	1.888	1	0.9504	1.001	1.02	1	0.9861	1.001	1.038	1	0.9747	1	1.022																Mean	0.999833	1.8725	1	1.59062	1	0.904667	1	0.948	0.9995	1.1035	1.00017	0.9835	0.999667	0.900402	1	0.943833
SD	0.08538	0.1301	0.1589	0.4367	0.02835	0.07574	0.1423	0.05961	0.1256	0.1224	0.09624	0.2515	0.06374	0.09385	0.1349	0.1697																SD	0.282049	0.405008	0.126048	0.242091	0.237351	0.200285	0.0770264	0.073	0.143496	0.0673402	0.153487	0.185685	0.135898	0.307955	0.251032	0.24833
SEM	0.03486	0.05312	0.06486	0.1783	0.01157	0.03092	0.05809	0.02433	0.05126	0.04996	0.03929	0.1027	0.02602	0.03831	0.05509	0.06929																SEM	0.115146	0.165344	0.0514591	0.0988334	0.0968982	0.0817662	0.031	0.03	0.058582	0.0274915	0.0626607	0.0758058	0.0554803	0.125722	0.102483	0.10138
CI	0.9104	0.7238	0.8338	1.43	0.9704	0.8709	0.8521	0.9572	0.8686	0.8577	0.8997	0.7741	0.9332	0.8762	0.8584	0.8442																CI	0.703841	1.44747	0.86772	1.33656	0.750915	0.69448	0.919832	0.871259	0.84891	1.03283	0.839092	0.788635	0.856493	0.577223	0.736558	0.683227
	1.09	0.9969	1.167	2.347	1.03	1.03	1.151	1.082	1.132	1.115	1.102	1.302	1.067	1.073	1.142	1.2																	1.29583	2.29753	1.13228	1.84468	1.24908	1.11485	1.0815	1.02441	1.15009	1.17417	1.16124	1.17836	1.14173	1.22358	1.26344	1.20444
Statistics striatum								Statistics cortex								Statistics hippocampus								Statistics cerebellum								Statistics striatum								Statistics cortex								Statistics hippocampus
LC3-I / β-actin								LC3-I / β-actin								LC3-I / β-actin								LC3-I / β-actin								LC3-II / β-actin								LC3-II / β-actin								LC3-II / β-actin
Unpaired t test								Unpaired t test								Unpaired t test								Unpaired t test								Unpaired t test								Unpaired t test								Unpaired t test
P value			0.0526					P value			0.1624					P value			0.8458					P value			0.5957					P value			0.0015					P value			0.4694					P value
P value summary			ns					P value summary			ns					P value summary			ns					P value summary			ns					P value summary			**					P value summary			ns					P value summary
Significantly different (P < 0.05)?			No					Significantly different (P < 0.05)?			No					Significantly different (P < 0.05)?			No					Significantly different (P < 0.05)?			No					Significantly different (P < 0.05)?			Yes					Significantly different (P < 0.05)?			No					Significantly different (P < 0.05)?
One- or two-tailed P value?			Two-tailed					One- or two-tailed P value?			Two-tailed					One- or two-tailed P value?			Two-tailed					One- or two-tailed P value?			Two-tailed					One- or two-tailed P value?			Two-tailed					One- or two-tailed P value?			Two-tailed					One- or two-tailed P value?
t, df			t=2,198, df=10					t, df			t=1,508, df=10					t, df			t=0,1995, df=10					t, df			t=0,5481, df=10					t, df			t=4,331, df=10					t, df			t=0,7519, df=10					t, df
How big is the difference?								How big is the difference?								How big is the difference?								How big is the difference?								How big is the difference?								How big is the difference?								How big is the difference?
Mean of column vehicle				1				Mean of column vehicle				1				Mean of column vehicle				1				Mean of column vehicle				1				Mean of column vehicle				0.9998				Mean of column vehicle				1				Mean of column vehicle
Mean of column THC				0.8603				Mean of column THC				0.9504				Mean of column THC				0.9861				Mean of column THC				0.9747				Mean of column THC				1.873				Mean of column THC				0.9047				Mean of column THC
Difference between means (THC - vehicle) ± SEM								Difference between means (THC - vehicle) ± SEM				-0,04980 ± 0,03301				Difference between means (THC - vehicle) ± SEM				-0,01428 ± 0,07158				Difference between means (THC - vehicle) ± SEM				-0,02538 ± 0,04632				Difference between means (THC - vehicle) ± SEM				0,8727 ± 0,2015				Difference between means (THC - vehicle) ± SEM				-0,09533 ± 0,1268				Difference between means (THC - vehicle) ± SEM
95% confidence interval				-0,2812 to 0,001892				95% confidence interval				-0,1234 to 0,02376				95% confidence interval				-0,1738 to 0,1452				95% confidence interval				-0,1286 to 0,07781				95% confidence interval				0,4237 to 1,322				95% confidence interval				-0,3778 to 0,1872				95% confidence interval
R squared (eta squared)				0.3258				R squared (eta squared)				0.1854				R squared (eta squared)				0.003966				R squared (eta squared)				0.02916				R squared (eta squared)				0.6523				R squared (eta squared)				0.05351				R squared (eta squared)
F test to compare variances								F test to compare variances								F test to compare variances								F test to compare variances								F test to compare variances								F test to compare variances								F test to compare variances
F, DFn, Dfd			2,322, 5, 5					F, DFn, Dfd			7,137, 5, 5					F, DFn, Dfd			1,053, 5, 5					F, DFn, Dfd			2,168, 5, 5					F, DFn, Dfd			2,062, 5, 5					F, DFn, Dfd			1,404, 5, 5					F, DFn, Dfd
P value			0.3766					P value			0.0501					P value			0.9566					P value			0.4158					P value			0.446					P value			0.7185					P value
P value summary			ns					P value summary			ns					P value summary			ns					P value summary			ns					P value summary			ns					P value summary			ns					P value summary
Significantly different (P < 0.05)?			No					Significantly different (P < 0.05)?			No					Significantly different (P < 0.05)?			No					Significantly different (P < 0.05)?			No					Significantly different (P < 0.05)?			No					Significantly different (P < 0.05)?			No					Significantly different (P < 0.05)?
Data analyzed		n	Power					Data analyzed		n	Power					Data analyzed		n	Power					Data analyzed		n	Power					Data analyzed		n	Power					Data analyzed		n	Power					Data analyzed
Sample size, vehicle		6	0.926					Sample size, vehicle		6	0.641					Sample size, vehicle		6	0.061					Sample size, vehicle		6	0.061					Sample size, vehicle		6	0.277					Sample size, vehicle		6	0.057					Sample size, vehicle
Sample size, THC		6						Sample size, THC		6						Sample size, THC		6						Sample size, THC		6						Sample size, THC		6						Sample size, THC		6						Sample size, THC
LC3-II / LC3-I								LC3-II / LC3-I								LC3-II / LC3-I								LC3-II / LC3-I								p62 / β-actin								p62 / β-actin								p62 / β-actin
Unpaired t test								Unpaired t test								Unpaired t test								Unpaired t test								Unpaired t test								Unpaired t test								Unpaired t test
P value			0.0009					P value			0.7764					P value			0.7417					P value			0.8058					P value			0.0003					P value			0.2505					P value
P value summary			***					P value summary			ns					P value summary			ns					P value summary			ns					P value summary			***					P value summary			ns					P value summary
Significantly different (P < 0.05)?			Yes					Significantly different (P < 0.05)?			No					Significantly different (P < 0.05)?			No					Significantly different (P < 0.05)?			No					Significantly different (P < 0.05)?			Yes					Significantly different (P < 0.05)?			No					Significantly different (P < 0.05)?
One- or two-tailed P value?			Two-tailed					One- or two-tailed P value?			Two-tailed					One- or two-tailed P value?			Two-tailed					One- or two-tailed P value?			Two-tailed					One- or two-tailed P value?			Two-tailed					One- or two-tailed P value?			Two-tailed					One- or two-tailed P value?
t, df			t=4,680, df=10					t, df			t=0,2919, df=10					t, df			t=0,3389, df=10					t, df			t=0,2525, df=10					t, df			t=5,303, df=10					t, df			t=1,220, df=10					t, df
How big is the difference?								How big is the difference?								How big is the difference?								How big is the difference?								How big is the difference?								How big is the difference?								How big is the difference?
Mean of column vehicle				1				Mean of column vehicle				1.001				Mean of column vehicle				1.001				Mean of column vehicle				1				Mean of column vehicle				0.9997				Mean of column vehicle				1				Mean of column vehicle
Mean of column THC				1.888				Mean of column THC				1.02				Mean of column THC				1.038				Mean of column THC				1.022				Mean of column THC				1.591				Mean of column THC				0.9478				Mean of column THC
Difference between means (THC - vehicle) ± SEM				0,8878 ± 0,1897				Difference between means (THC - vehicle) ± SEM				0,01838 ± 0,06298				Difference between means (THC - vehicle) ± SEM				0,03725 ± 0,1099				Difference between means (THC - vehicle) ± SEM				0,02235 ± 0,08852				Difference between means (THC - vehicle) ± SEM				0,5910 ± 0,1114				Difference between means (THC - vehicle) ± SEM				-0,05283 ± 0,04332				Difference between means (THC - vehicle) ± SEM
95% confidence interval				0,4651 to 1,310				95% confidence interval				-0,1220 to 0,1587				95% confidence interval				-0,2077 to 0,2822				95% confidence interval				-0,1749 to 0,2196				95% confidence interval				0,3427 to 0,8393				95% confidence interval				-0,1493 to 0,04368				95% confidence interval
R squared (eta squared)				0.6865				R squared (eta squared)				0.008446				R squared (eta squared)				0.01135				R squared (eta squared)				0.006335				R squared (eta squared)				0.7377				R squared (eta squared)				0.1295				R squared (eta squared)
F test to compare variances								F test to compare variances								F test to compare variances								F test to compare variances								F test to compare variances								F test to compare variances								F test to compare variances
F, DFn, Dfd			7,556, 5, 5					F, DFn, Dfd			5,699, 5, 5					F, DFn, Dfd			6,828, 5, 5					F, DFn, Dfd			1,582, 5, 5					F, DFn, Dfd			3,698, 5, 5					F, DFn, Dfd			1,114, 5, 5					F, DFn, Dfd
P value			0.0445					P value			0.079					P value			0.0549					P value			0.6271					P value			0.1775					P value			0.9083					P value
P value summary			*					P value summary			ns					P value summary			ns					P value summary			ns					P value summary			ns					P value summary			ns					P value summary
Significantly different (P < 0.05)?			Yes					Significantly different (P < 0.05)?			No					Significantly different (P < 0.05)?			No					Significantly different (P < 0.05)?			No					Significantly different (P < 0.05)?			No					Significantly different (P < 0.05)?			No					Significantly different (P < 0.05)?
Data analyzed			n	Power				Data analyzed			n	Power				Data analyzed			n	Power				Data analyzed			n	Power				Data analyzed			n		Power			Data analyzed			n		Power			Data analyzed
Sample size, vehicle			6	1				Sample size, vehicle			6	0.076				Sample size, vehicle			6	0.09				Sample size, vehicle			6	0.065				Sample size, vehicle			6		0.325			Sample size, vehicle			6		0.076			Sample size, vehicle
Sample size, THC			6					Sample size, THC			6					Sample size, THC			6					Sample size, THC			6					Sample size, THC			6					Sample size, THC			6					Sample size, THC
[truncated: 11 more columns]
