# Supplementary material for: Inhibition of striatonigral autophagy as a link between cannabinoid intoxication and impairment of motor coordination
Source: eLife. 2020 Aug 10;9:e56811. doi: 10.7554/eLife.56811 (PMC7417168; doi:10.7554/eLife.56811)
Supplement: Figure 2—source data 1. [file elife-56811-fig2-data1.xlsx]

## Sheet: Figure 2
Figure 2 - THC impairs autophagy in primary striatal neurons
Figure 2A upper panel - LC3-II-positive cells relative to total cells														Figure 2A lower panel - LC3-II/LAMP1-positive cells relative to total cells														Figure 2B - p62 fluorescence intensity relative to total cells (arbitrary units)
Raw Data	Vehicle						Mean	SD	SEM	CI				Raw Data	Vehicle						Mean	SD	SEM	CI				Raw Data	Vehicle						Mean	SD	SEM	CI
Vehicle	0.033	0.044	0.056	0.067	0.036	0.067	0.0504	0.0149	0.00606	0.0348	0.0659			Vehicle	0.03	0.04	0.042	0.03	0.049	0.05	0.04017	0.008773	0.003582	0.03096	0.04937			Vehicle	1.33	0.839	0.976	1.067	0.79	1	1	0.1917	0.07824	0.7994	1.202
THC	0.132	0.126	0.141	0.111	0.106	0.183	0.133	0.0279	0.0114	0.104	0.162			THC	0.145	0.082	0.155	0.149	0.144	0.115	0.1317	0.028	0.01143	0.1023	0.161			THC	1.97	1.88	2.3	1.6	1.5		1.85	0.3173	0.1419	1.456	2.244
HU	0.116	0.136	0.179	0.191	0.114	0.143	0.147	0.0323	0.0132	0.113	0.18			HU	0.162	0.156	0.171	0.155	0.167	0.165	0.1627	0.006282	0.002565	0.1561	0.1693			HU	1.7	1.9	1.7	1.72	1.81		1.766	0.08764	0.03919	1.657	1.875
	HCQ														HCQ														HCQ
Vehicle	0.163	0.159	0.169	0.2			0.173	0.0186	0.00931	0.143	0.202			Vehicle	0.182	0.147	0.134	0.178			0.1603	0.02347	0.01174	0.1229	0.1976			Vehicle	3.2	2.63	1.8	1.77	1.8		2.24	0.6484	0.29	1.435	3.045
THC	0.227	0.15	0.263				0.213	0.0155	0.0333	0.0699	0.357			THC	0.2	0.147	0.149				0.1653	0.03004	0.01734	0.09071	0.24			THC	2.91	2.99	2.3	2.34			2.635	0.3656	0.1828	2.053	3.217
HU	0.22	0.247	0.22				0.229	0.0155	0.00895	0.191	0.268			HU	0.22	0.155	0.169				0.1813	0.03421	0.01975	0.09635	0.2663			HU	2.6	2.47	2.56	2.14			2.443	0.2089	0.1044	2.11	2.775
	E64d/PA														E64d/PA														E64d/PA
Vehicle	0.155	0.131	0.131				0.139	0.0139	0.008	0.105	0.173			Vehicle	0.09	0.17	0.125				0.1283	0.0401	0.02315	0.02871	0.228			Vehicle	2.78	2.8	2.023	3.2			2.701	0.4915	0.2458	1.919	3.483
THC	0.165	0.14	0.153				0.153	0.0125	0.00722	0.122	0.184			THC	0.13	0.14	0.167				0.1457	0.01914	0.01105	0.09812	0.1932			THC	2.6	2.245	3.06				2.635	0.4086	0.2359	1.62	3.65
HU	0.217	0.155	0.187				0.186	0.031	0.0179	0.109	0.263			HU	0.172	0.168	0.173				0.171	0.002646	0.001528	0.1644	0.1776			HU	2.79	2.74	2.853				2.794	0.05662	0.03269	2.654	2.935
Statistics														Statistics														Statistics
Two-way ANOVA														Two-way ANOVA														Two-way ANOVA
Alpha	0.05													Alpha	0.05													Alpha	0.05
Source of Variation		% of total variation		P value	P value summary		Significant?							Source of Variation		% of total variation		P value	P value summary		Significant?							Source of Variation		% of total variation		P value	P value summary		Significant?
Interaction		4.903		0.1297	ns		No							Interaction		18.11		0.0002	***		Yes							Interaction		6.367		0.1002	ns		No
Row Factor		22.39		<0,0001	****		Yes							Row Factor		25.23		<0,0001	****		Yes							Row Factor		7.177	7.177	0.0152	*		Yes
Column Factor		49.62		<0,0001	****		Yes							Column Factor		25.68		<0,0001	****		Yes							Column Factor		57.72	57.72	<0,0001	****		Yes
ANOVA table		SS (Type III)	DF	MS	F (DFn, DFd)		P value							ANOVA table		SS (Type III)	DF	MS	F (DFn, DFd)		P value							ANOVA table		SS (Type III)	DF	MS	F (DFn, DFd)		P value
Interaction		0.005829	4	0.001457	F (4, 28) = 1,951		P=0,1297							Interaction		0.01612	4	0.004029	F (4, 28) = 7,910		P=0,0002							Interaction		1.112	4	0.278	F (4, 30) = 2,141		P=0,1002
Row Factor		0.02662	2	0.01331	F (2, 28) = 17,82		P<0,0001							Row Factor		0.02245	2	0.01122	F (2, 28) = 22,03		P<0,0001							Row Factor		1.254	2	0.6268	F (2, 30) = 4,826		P=0,0152
Column Factor		0.05899	2	0.0295	F (2, 28) = 39,48		P<0,0001							Column Factor		0.02285	2	0.01142	F (2, 28) = 22,43		P<0,0001							Column Factor		10.08	2	5.041	F (2, 30) = 38,81		P<0,0001
Residual		0.02092	28	0.000747										Residual		0.01426	28	0.0005094										Residual		3.896	30	0.1299
R2														R2														R2
Two-way ANOVA (multiple comparisons)														Two-way ANOVA (multiple comparisons)														Two-way ANOVA (multiple comparisons)
Number of families			1	Power										Number of families			1	Power										Number of families			1	Power
Number of comparisons per family			36	0.523										Number of comparisons per family			36	0.146										Number of comparisons per family			36	0.62
Alpha			0.05											Alpha			0.05											Alpha			0.05
Tukey's multiple comparisons test			Mean Diff,	95,00% CI of diff,		Significant?	Summary	Adjusted P Value						Tukey's multiple comparisons test			Mean Diff,	95,00% CI of diff,		Significant?	Summary	Adjusted P Value						Tukey's multiple comparisons test			Mean Diff,	95,00% CI of diff,		Significant?	Summary	Adjusted P Value
Vehicle vs. HCQ			-0.1223	-0,1814 to -0,06306		Yes	****	<0,0001						Vehicle vs. HCQ			-0.1201	-0,1690 to -0,07121		Yes	****	<0,0001						Vehicle vs. HCQ			-1.24	-1,968 to -0,5114		Yes	***	0.0001
Vehicle vs. E64d/PA			-0.0885	-0,1533 to -0,02366		Yes	**	0.0024						Vehicle vs. E64d/PA			-0.08817	-0,1417 to -0,03462	-0,1417 to -0,03462	Yes	***	0.0002	0.0002					Vehicle vs. E64d/PA			-1.7	-2,477 to -0,9240		Yes	****	<0,0001
Vehicle vs. THC			-0.08267	-0,1356 to -0,02973		Yes	***	0.0004						Vehicle vs. THC			-0.0915	-0,1352 to -0,04778	-0,1352 to -0,04778	Yes	****	<0,0001	<0,0001					Vehicle vs. THC			-0.8497	-1,578 to -0,1214		Yes	*	0.013
Vehicle vs. HCQ+THC			-0.1628	-0,2277 to -0,09799		Yes	****	<0,0001						Vehicle vs. HCQ+THC			-0.1252	-0,1787 to -0,07162	-0,1787 to -0,07162	Yes	****	<0,0001	<0,0001					Vehicle vs. HCQ+THC			-1.635	-2,411 to -0,8583		Yes	****	<0,0001
Vehicle vs. E64d/PA+THC			-0.1022	-0,1670 to -0,03733		Yes	***	0.0004						Vehicle vs. E64d/PA+THC			-0.1055	-0,1590 to -0,05196	-0,1590 to -0,05196	Yes	****	<0,0001	<0,0001					Vehicle vs. E64d/PA+THC			-1.635	-2,485 to -0,7842		Yes	****	<0,0001
Vehicle vs. HU			-0.096	-0,1489 to -0,04306		Yes	****	<0,0001						Vehicle vs. HU			-0.1225	-0,1662 to -0,07878	-0,1662 to -0,07878	Yes	****	<0,0001	<0,0001					Vehicle vs. HU			-0.7657	-1,494 to -0,03736		Yes	*	0.0335
Vehicle vs. HCQ+HU			-0.1785	-0,2433 to -0,1137		Yes	****	<0,0001						Vehicle vs. HCQ+HU			-0.1412	-0,1947 to -0,08762	-0,1947 to -0,08762	Yes	****	<0,0001	<0,0001					Vehicle vs. HCQ+HU			-1.442	-2,219 to -0,6658		Yes	****	<0,0001
Vehicle vs. E64d/PA+HU			-0.1358	-0,2007 to -0,07099		Yes	****	<0,0001						Vehicle vs. E64d/PA+HU			-0.1308	-0,1844 to -0,07729	-0,1844 to -0,07729	Yes	****	<0,0001	<0,0001					Vehicle vs. E64d/PA+HU			-1.794	-2,644 to -0,9435		Yes	****	<0,0001
HCQ vs. E64d/PA			0.03375	-0,03628 to 0,1038		No	ns	0.788						HCQ vs. E64d/PA			0.03192	-0,02592 to 0,08975	-0,02592 to 0,08975	No	ns	0.6498	0.6498					HCQ vs. E64d/PA			-0.4608	-1,268 to 0,3461		No	ns	0.6151
HCQ vs. THC			0.03958	-0,01961 to 0,09877		No	ns	0.407						HCQ vs. THC			0.02858	-0,02029 to 0,07746	-0,02029 to 0,07746	No	ns	0.5799	0.5799					HCQ vs. THC			0.39	-0,3707 to 1,151		No	ns	0.7354
HCQ vs. HCQ+THC			-0.04058	-0,1106 to 0,02945		No	ns	0.5913						HCQ vs. HCQ+THC			-0.005083	-0,06292 to 0,05275	-0,06292 to 0,05275	No	ns	>0,9999	>0,9999					HCQ vs. HCQ+THC			-0.395	-1,202 to 0,4118		No	ns	0.7791
HCQ vs.E64d/PA+THC			0.02008	-0,04995 to 0,09012		No	ns	0.9865						HCQ vs.E64d/PA+THC			0.01458	-0,04325 to 0,07242	-0,04325 to 0,07242	No	ns	0.9941	0.9941					HCQ vs.E64d/PA+THC			-0.395	-1,273 to 0,4834		No	ns	0.8464
HCQ vs. HU			0.02625	-0,03294 to 0,08544		No	ns	0.8517						HCQ vs. HU			-0.002417	-0,05129 to 0,04646	-0,05129 to 0,04646	No	ns	>0,9999	>0,9999					HCQ vs. HU			0.474	-0,2867 to 1,235		No	ns	0.5046
HCQ vs. HCQ+HU			-0.05625	-0,1263 to 0,01378		No	ns	0.195						HCQ vs. HCQ+HU			-0.02108	-0,07892 to 0,03675	-0,07892 to 0,03675	No	ns	0.9443	0.9443					HCQ vs. HCQ+HU			-0.2025	-1,009 to 0,6043		No	ns	0.9946
HCQ vs. E64d/PA+HU			-0.01358	-0,08362 to 0,05645		No	ns	0.999						HCQ vs. E64d/PA+HU			-0.01075	-0,06858 to 0,04708	-0,06858 to 0,04708	No	ns	0.9993	0.9993					HCQ vs. E64d/PA+HU			-0.5543	-1,433 to 0,3240		No	ns	0.488
E64d/PA vs. THC			0.005833	-0,05901 to 0,07067		No	ns	>0,9999						E64d/PA vs. THC			-0.003333	-0,05688 to 0,05021	-0,05688 to 0,05021	No	ns	>0,9999	>0,9999					E64d/PA vs. THC			0.8508	0,04391 to 1,658		Yes	*	0.0327
E64d/PA vs. HCQ+THC			-0.07433	-0,1492 to 0,0005367		No	ns	0.0528						E64d/PA vs. HCQ+THC			-0.037	-0,09883 to 0,02483	-0,09883 to 0,02483	No	ns	0.5508	0.5508					E64d/PA vs. HCQ+THC			0.06575	-0,7847 to 0,9162		No	ns	>0,9999
E64d/PA vs. E64d/PA+THC			-0.01367	-0,08854 to 0,06120		No	ns	0.9994						E64d/PA vs. E64d/PA+THC			-0.01733	-0,07916 to 0,04449	-0,07916 to 0,04449	No	ns	0.9883	0.9883					E64d/PA vs. E64d/PA+THC			0.06575	-0,8529 to 0,9844		No	ns	>0,9999
E64d/PA vs. HU			-0.0075	-0,07234 to 0,05734		No	ns	>0,9999						E64d/PA vs. HU			-0.03433	-0,08788 to 0,01921	-0,08788 to 0,01921	No	ns	0.4616	0.4616					E64d/PA vs. HU			0.9348	0,1279 to 1,742		Yes	*	0.0139
E64d/PA vs. HCQ+HU			-0.09	-0,1649 to -0,01513		Yes	**	0.0099						E64d/PA vs. HCQ+HU			-0.053	-0,1148 to 0,008825	-0,1148 to 0,008825	No	ns	0.1381	0.1381					E64d/PA vs. HCQ+HU			0.2583	-0,5922 to 1,109		No	ns	0.9815
E64d/PA vs. E64d/PA+HU			-0.04733	-0,1222 to 0,02754		No	ns	0.4801						E64d/PA vs. E64d/PA+HU			-0.04267	-0,1045 to 0,01916	-0,1045 to 0,01916	No	ns	0.3669	0.3669					E64d/PA vs. E64d/PA+HU			-0.09358	-1,012 to 0,8250		No	ns	>0,9999
THC vs. HCQ+THC			-0.08017	-0,1450 to -0,01533		Yes	**	0.0074						THC vs. HCQ+THC			-0.03367	-0,08721 to 0,01988	-0,08721 to 0,01988	No	ns	0.4871	0.4871					THC vs. HCQ+THC			-0.785	-1,592 to 0,02184		No	ns	0.0614
THC vs. E64d/PA+THC			-0.0195	-0,08434 to 0,04534		No	ns	0.9818						THC vs. E64d/PA+THC			-0.014	-0,06754 to 0,03954	-0,06754 to 0,03954	No	ns	0.9925	0.9925					THC vs. E64d/PA+THC			-0.785	-1,663 to 0,09337		No	ns	0.1088
THC vs. HU			-0.01333	-0,06627 to 0,03961		No	ns	0.9942						THC vs. HU			-0.031	-0,07472 to 0,01272	-0,07472 to 0,01272	No	ns	0.3331	0.3331					THC vs. HU			0.084	-0,6767 to 0,8447		No	ns	>0,9999
THC vs. HCQ+HU			-0.09583	-0,1607 to -0,03099		Yes	***	0.0009						THC vs. HCQ+HU			-0.04967	-0,1032 to 0,003876	-0,1032 to 0,003876	No	ns	0.0851	0.0851					THC vs. HCQ+HU			-0.5925	-1,399 to 0,2143		No	ns	0.2948
THC vs. E64d/PA+HU			-0.05317	-0,1180 to 0,01167		No	ns	0.1756						THC vs. E64d/PA+HU			-0.03933	-0,09288 to 0,01421	-0,09288 to 0,01421	No	ns	0.2906	0.2906					THC vs. E64d/PA+HU			-0.9443	-1,823 to -0,06596		Yes	*	0.0277
HCQ+THC vs. E64d/PA+THC			0.06067	-0,01420 to 0,1355		No	ns	0.1866						HCQ+THC vs. E64d/PA+THC			0.01967	-0,04216 to 0,08149	-0,04216 to 0,08149	No	ns	0.9744	0.9744					HCQ+THC vs. E64d/PA+THC			0	-0,9186 to 0,9186		No	ns	>0,9999
HCQ+THC vs. HU			0.06683	0,001994 to 0,1317		Yes	*	0.0395						HCQ+THC vs. HU			0.002667	-0,05088 to 0,05621	-0,05088 to 0,05621	No	ns	>0,9999	>0,9999					HCQ+THC vs. HU			0.869	0,06216 to 1,676		Yes	*	0.0273
HCQ+THC vs. HCQ+HU			-0.01567	-0,09054 to 0,05920		No	ns	0.9984						HCQ+THC vs. HCQ+HU			-0.016	-0,07783 to 0,04583	-0,07783 to 0,04583	No	ns	0.993	0.993					HCQ+THC vs. HCQ+HU			0.1925	-0,6580 to 1,043		No	ns	0.9973
HCQ+THC vs. E64d/PA+HU			0.027	-0,04787 to 0,1019		No	ns	0.9475						HCQ+THC vs. E64d/PA+HU			-0.005667	-0,06749 to 0,05616	-0,06749 to 0,05616	No	ns	>0,9999	>0,9999					HCQ+THC vs. E64d/PA+HU			-0.1593	-1,078 to 0,7593		No	ns	0.9996
E64d/PA+THC vs. HU			0.006167	-0,05867 to 0,07101		No	ns	>0,9999						E64d/PA+THC vs. HU			-0.017	-0,07054 to 0,03654	-0,07054 to 0,03654	No	ns	0.9747	0.9747					E64d/PA+THC vs. HU			0.869	-0,009373 to 1,747		No	ns	0.0542
E64d+PA+THC vs. HCQ+HU			-0.07633	-0,1512 to -0,001463		Yes	*	0.0431						E64d+PA+THC vs. HCQ+HU			-0.03567	-0,09749 to 0,02616	-0,09749 to 0,02616	No	ns	0.5968	0.5968					E64d+PA+THC vs. HCQ+HU			0.1925	-0,7261 to 1,111		No	ns	0.9984
E64d/PA+THC vs. E64d/PA+HU			-0.03367	-0,1085 to 0,04120		No	ns	0.8422						E64d/PA+THC vs. E64d/PA+HU			-0.02533	-0,08716 to 0,03649	-0,08716 to 0,03649	No	ns	0.898	0.898					E64d/PA+THC vs. E64d/PA+HU			-0.1593	-1,141 to 0,8227		No	ns	0.9998
HU vs. HCQ+HU			-0.0825	-0,1473 to -0,01766		Yes	**	0.0054						HU vs. HCQ+HU			-0.01867	-0,07221 to 0,03488	-0,07221 to 0,03488	No	ns	0.9565	0.9565					HU vs. HCQ+HU			-0.6765	-1,483 to 0,1303		No	ns	0.1578
HU vs. E64d/PA+HU			-0.03983	-0,1047 to 0,02501		No	ns	0.5173						HU vs. E64d/PA+HU			-0.008333	-0,06188 to 0,04521	-0,06188 to 0,04521	No	ns	0.9998	0.9998					HU vs. E64d/PA+HU			-1.028	-1,907 to -0,1500		Yes	*	0.0126
HCQ+HU vs. E64d/PA+HU			0.04267	-0,03220 to 0,1175		No	ns	0.6117						HCQ+HU vs. E64d/PA+HU			0.01033	-0,05149 to 0,07216	-0,05149 to 0,07216	No	ns	0.9997	0.9997					HCQ+HU vs. E64d/PA+HU			-0.3518	-1,270 to 0,5668		No	ns	0.93
Test details			Mean 1	Mean 2	Mean Diff,	SE of diff,	N1	N2	q	DF				Test details			Mean 1	Mean 2	Mean Diff,	SE of diff,	N1	N2	q	DF				Test details			Mean 1	Mean 2	Mean Diff,	SE of diff,	N1	N2	q	DF
Vehicle vs. HCQ			0.0505	0.1728	-0.1223	0.01764	6	4	9.799	28				Vehicle vs. HCQ			0.04017	0.1603	-0.1201	0.01457	6	4	11.66	28				Vehicle vs. HCQ			1	2.24	-1.24	0.2182	6	5	8.034	30
Vehicle vs. E64d/PA			0.0505	0.139	-0.0885	0.01933	6	3	6.476	28				Vehicle vs. E64d/PA			0.04017	0.1283	-0.08817	0.01596	6	3	7.813	28				Vehicle vs. E64d/PA			1	2.701	-1.7	0.2326	6	4	10.34	30
Vehicle vs. THC			0.0505	0.1332	-0.08267	0.01578	6	6	7.409	28				Vehicle vs. THC			0.04017	0.1317	-0.0915	0.01303	6	6	9.931	28				Vehicle vs. THC			1	1.85	-0.8497	0.2182	6	5	5.506	30
Vehicle vs. HCQ+THC			0.0505	0.2133	-0.1628	0.01933	6	3	11.92	28				Vehicle vs. HCQ+THC			0.04017	0.1653	-0.1252	0.01596	6	3	11.09	28				Vehicle vs. HCQ+THC			1	2.635	-1.635	0.2326	6	4	9.938	30
Vehicle vs. E64d/PA+THC			0.0505	0.1527	-0.1022	0.01933	6	3	7.476	28				Vehicle vs. E64d/PA+THC			0.04017	0.1457	-0.1055	0.01596	6	3	9.349	28				Vehicle vs. E64d/PA+THC			1	2.635	-1.635	0.2548	6	3	9.072	30
Vehicle vs. HU			0.0505	0.1465	-0.096	0.01578	6	6	8.604	28				Vehicle vs. HU			0.04017	0.1627	-0.1225	0.01303	6	6	13.29	28				Vehicle vs. HU			1	1.766	-0.7657	0.2182	6	5	4.962	30
Vehicle vs. HCQ+HU			0.0505	0.229	-0.1785	0.01933	6	3	13.06	28				Vehicle vs. HCQ+HU			0.04017	0.1813	-0.1412	0.01596	6	3	12.51	28				Vehicle vs. HCQ+HU			1	2.443	-1.442	0.2326	6	4	8.768	30
Vehicle vs. E64d/PA+HU			0.0505	0.1863	-0.1358	0.01933	6	3	9.94	28				Vehicle vs. E64d/PA+HU			0.04017	0.171	-0.1308	0.01596	6	3	11.59	28				Vehicle vs. E64d/PA+HU			1	2.794	-1.794	0.2548	6	3	9.956	30
HCQ vs. E64d/PA			0.1728	0.139	0.03375	0.02087	4	3	2.286	28				HCQ vs. E64d/PA			0.1603	0.1283	0.03192	0.01724	4	3	2.618	28				HCQ vs. E64d/PA			2.24	2.701	-0.4608	0.2417	5	4	2.695	30
HCQ vs. THC			0.1728	0.1332	0.03958	0.01764	4	6	3.173	28				HCQ vs. THC			0.1603	0.1317	0.02858	0.01457	4	6	2.775	28				HCQ vs. THC			2.24	1.85	0.39	0.2279	5	5	2.42	30
HCQ vs. HCQ+THC			0.1728	0.2133	-0.04058	0.02087	4	3	2.749	28				HCQ vs. HCQ+THC			0.1603	0.1653	-0.005083	0.01724	4	3	0.417	28				HCQ vs. HCQ+THC			2.24	2.635	-0.395	0.2417	5	4	2.311	30
HCQ vs.E64d/PA+THC			0.1728	0.1527	0.02008	0.02087	4	3	1.361	28				HCQ vs.E64d/PA+THC			0.1603	0.1457	0.01458	0.01724	4	3	1.196	28				HCQ vs.E64d/PA+THC			2.24	2.635	-0.395	0.2632	5	3	2.123	30
HCQ vs. HU			0.1728	0.1465	0.02625	0.01764	4	6	2.104	28				HCQ vs. HU			0.1603	0.1627	-0.002417	0.01457	4	6	0.2346	28				HCQ vs. HU			2.24	1.766	0.474	0.2279	5	5	2.941	30
HCQ vs. HCQ+HU			0.1728	0.229	-0.05625	0.02087	4	3	3.811	28				HCQ vs. HCQ+HU			0.1603	0.1813	-0.02108	0.01724	4	3	1.73	28				HCQ vs. HCQ+HU			2.24	2.443	-0.2025	0.2417	5	4	1.185	30
HCQ vs. E64d/PA+HU			0.1728	0.1863	-0.01358	0.02087	4	3	0.9202	28				HCQ vs. E64d/PA+HU			0.1603	0.171	-0.01075	0.01724	4	3	0.8819	28				HCQ vs. E64d/PA+HU			2.24	2.794	-0.5543	0.2632	5	3	2.979	30
E64d/PA vs. THC			0.139	0.1332	0.005833	0.01933	3	6	0.4269	28				E64d/PA vs. THC			0.1283	0.1317	-0.003333	0.01596	3	6	0.2954	28				E64d/PA vs. THC			2.701	1.85	0.8508	0.2417	4	5	4.977	30
E64d/PA vs. HCQ+THC			0.139	0.2133	-0.07433	0.02232	3	3	4.711	28				E64d/PA vs. HCQ+THC			0.1283	0.1653	-0.037	0.01843	3	3	2.839	28				E64d/PA vs. HCQ+THC			2.701	2.635	0.06575	0.2548	4	4	0.3649	30
E64d/PA vs. E64d/PA+THC			0.139	0.1527	-0.01367	0.02232	3	3	0.8661	28				E64d/PA vs. E64d/PA+THC			0.1283	0.1457	-0.01733	0.01843	3	3	1.33	28				E64d/PA vs. E64d/PA+THC			2.701	2.635	0.06575	0.2752	4	3	0.3378	30
E64d/PA vs. HU			0.139	0.1465	-0.0075	0.01933	3	6	0.5488	28				E64d/PA vs. HU			0.1283	0.1627	-0.03433	0.01596	3	6	3.042	28				E64d/PA vs. HU			2.701	1.766	0.9348	0.2417	4	5	5.468	30
E64d/PA vs. HCQ+HU			0.139	0.229	-0.09	0.02232	3	3	5.703	28				E64d/PA vs. HCQ+HU			0.1283	0.1813	-0.053	0.01843	3	3	4.067	28				E64d/PA vs. HCQ+HU			2.701	2.443	0.2583	0.2548	4	4	1.433	30
E64d/PA vs. E64d/PA+HU			0.139	0.1863	-0.04733	0.02232	3	3	3	28				E64d/PA vs. E64d/PA+HU			0.1283	0.171	-0.04267	0.01843	3	3	3.274	28				E64d/PA vs. E64d/PA+HU			2.701	2.794	-0.09358	0.2752	4	3	0.4808	30
THC vs. HCQ+THC			0.1332	0.2133	-0.08017	0.01933	6	3	5.866	28				THC vs. HCQ+THC			0.1317	0.1653	-0.03367	0.01596	6	3	2.983	28				THC vs. HCQ+THC			1.85	2.635	-0.785	0.2417	5	4	4.592	30
THC vs. E64d/PA+THC			0.1332	0.1527	-0.0195	0.01933	6	3	1.427	28				THC vs. E64d/PA+THC			0.1317	0.1457	-0.014	0.01596	6	3	1.241	28				THC vs. E64d/PA+THC			1.85	2.635	-0.785	0.2632	5	3	4.218	30
THC vs. HU			0.1332	0.1465	-0.01333	0.01578	6	6	1.195	28				THC vs. HU			0.1317	0.1627	-0.031	0.01303	6	6	3.364	28				THC vs. HU			1.85	1.766	0.084	0.2279	5	5	0.5212	30
THC vs. HCQ+HU			0.1332	0.229	-0.09583	0.01933	6	3	7.013	28				THC vs. HCQ+HU			0.1317	0.1813	-0.04967	0.01596	6	3	4.401	28				THC vs. HCQ+HU			1.85	2.443	-0.5925	0.2417	5	4	3.466	30
THC vs. E64d/PA+HU			0.1332	0.1863	-0.05317	0.01933	6	3	3.89	28				THC vs. E64d/PA+HU			0.1317	0.171	-0.03933	0.01596	6	3	3.486	28				THC vs. E64d/PA+HU			1.85	2.794	-0.9443	0.2632	5	3	5.074	30
HCQ+THC vs. E64d/PA+THC			0.2133	0.1527	0.06067	0.02232	3	3	3.845	28				HCQ+THC vs. E64d/PA+THC			0.1653	0.1457	0.01967	0.01843	3	3	1.509	28				HCQ+THC vs. E64d/PA+THC			2.635	2.635	0	0.2752	4	3	0	30
HCQ+THC vs. HU			0.2133	0.1465	0.06683	0.01933	3	6	4.891	28				HCQ+THC vs. HU			0.1653	0.1627	0.002667	0.01596	3	6	0.2363	28				HCQ+THC vs. HU			2.635	1.766	0.869	0.2417	4	5	5.084	30
HCQ+THC vs. HCQ+HU			0.2133	0.229	-0.01567	0.02232	3	3	0.9928	28				HCQ+THC vs. HCQ+HU			0.1653	0.1813	-0.016	0.01843	3	3	1.228	28				HCQ+THC vs. HCQ+HU			2.635	2.443	0.1925	0.2548	4	4	1.068	30
HCQ+THC vs. E64d/PA+HU			0.2133	0.1863	0.027	0.02232	3	3	1.711	28				HCQ+THC vs. E64d/PA+HU			0.1653	0.171	-0.005667	0.01843	3	3	0.4349	28				HCQ+THC vs. E64d/PA+HU			2.635	2.794	-0.1593	0.2752	4	3	0.8187	30
E64d/PA+THC vs. HU			0.1527	0.1465	0.006167	0.01933	3	6	0.4512	28				E64d/PA+THC vs. HU			0.1457	0.1627	-0.017	0.01596	3	6	1.506	28				E64d/PA+THC vs. HU			2.635	1.766	0.869	0.2632	3	5	4.67	30
E64d+PA+THC vs. HCQ+HU			0.1527	0.229	-0.07633	0.02232	3	3	4.837	28				E64d+PA+THC vs. HCQ+HU			0.1457	0.1813	-0.03567	0.01843	3	3	2.737	28				E64d+PA+THC vs. HCQ+HU			2.635	2.443	0.1925	0.2752	3	4	0.9891	30
E64d/PA+THC vs. E64d/PA+HU			0.1527	0.1863	-0.03367	0.02232	3	3	2.134	28				E64d/PA+THC vs. E64d/PA+HU			0.1457	0.171	-0.02533	0.01843	3	3	1.944	28				E64d/PA+THC vs. E64d/PA+HU			2.635	2.794	-0.1593	0.2942	3	3	0.7658	30
HU vs. HCQ+HU			0.1465	0.229	-0.0825	0.01933	6	3	6.037	28				HU vs. HCQ+HU			0.1627	0.1813	-0.01867	0.01596	6	3	1.654	28				HU vs. HCQ+HU			1.766	2.443	-0.6765	0.2417	5	4	3.957	30
HU vs. E64d/PA+HU			0.1465	0.1863	-0.03983	0.01933	6	3	2.915	28				HU vs. E64d/PA+HU			0.1627	0.171	-0.008333	0.01596	6	3	0.7385	28				HU vs. E64d/PA+HU			1.766	2.794	-1.028	0.2632	5	3	5.526	30
HCQ+HU vs. E64d/PA+HU			0.229	0.1863	0.04267	0.02232	3	3	2.704	28				HCQ+HU vs. E64d/PA+HU			0.1813	0.171	0.01033	0.01843	3	3	0.793	28				HCQ+HU vs. E64d/PA+HU			2.443	2.794	-0.3518	0.2752	4	3	1.808	30
