# Supplementary material for: Inhibition of striatonigral autophagy as a link between cannabinoid intoxication and impairment of motor coordination
Source: eLife. 2020 Aug 10;9:e56811. doi: 10.7554/eLife.56811 (PMC7417168; doi:10.7554/eLife.56811)
Supplement: Figure 3—source data 1. [file elife-56811-fig3-data1.xlsx]

## Sheet: Figure 3
Figure 3 with 1 supplement - Temsirolimus prevents the THC-induced impairment of striatal autophagy and motor coordination in vivo impairment of striatal autophagy and motor coordination in vivo.
Figure 3A - Motor coordination (time to fall, s)															Figure 3B - Western blot analysis of autophagy markers in the striatum (optical density values)															Figure 3C - Western blot analysis of mTORC1 signalling pathway markers in the striatum (optical density values)
Raw Data	Vehicle			THC			Temsirolimus			Temsirolimus + THC					Raw Data	LC3-II / β-actin						p62 / β-actin								Raw Data	pS6K-T389 / S6K						pULK1-S757 / ULK1						pULK1-S555 / ULK1
	Pre-treatment	Post-treatment	Post-treatment/Pre-treatment	Pre-treatment	Post-treatment	Post-treatment/Pre-treatment	Pre-treatment	Post-treatment	Post-treatment/Pre-treatment	Pre-treatment	Post-treatment	Post-treatment/Pre-treatment				Vehicle	THC	Temsirolimus		Temsirolimus + THC		Vehicle	THC	Temsirolimus		Temsirolimus + THC					Vehicle	THC	Temsirolimus		Temsirolimus + THC		Vehicle	THC	Temsirolimus		Temsirolimus + THC		Vehicle	THC	Temsirolimus		Temsirolimus + THC
	65.8	103.667	1.57548	95.5	70.3333	0.736475	95.1667	85.3333	0.896673	122.167	158	1.29332				0.984	1.486	1.009	1.741	1.741		1.047	1.485	1.108	0.857	0.857	0.857				1.001	1.22	0.88		0.9		1.009	1.226	0.88		1.04		0.848	1.154	0.88	0.91	0.91	0.91
	158.833	182.333	1.14795	82.5	42	0.509091	112.583	117.667	1.04515	115.5	178.667	1.5469				0.947	1.142	1.38	1.384	1.384		0.924	1.284	1.162	0.995	0.995	0.995				1.021	1.29	0.86		1.003		0.98	1.212	0.86		0.994		1.152	0.91	0.86	1.08	1.08	1.08
	90	131.333	1.45926	120.4	73.3333	0.609081	83.3333	157	1.884	89.8333	173.5	1.93135				1.016	1.414	1.112	1.631	1.631		0.913	1.443	1.205	0.94	0.94	0.94				1.076	1.25	0.9		0.77		1.172	1.5	0.9		1.27		1.127	1.092	0.9	1.057	1.057	1.057
	120.167	159.333	1.32594	114	73.3333	0.643275	92.6667	175.667	1.89568	172	210.333	1.22287				1.053	1.572	1.33	1.532	1.532		1.117	1.184	1.184	1.08	1.08	1.08				0.903	1.21	0.83		0.88		0.839	1.32	0.83		0.86		0.873	0.702	0.83	0.87	0.87	0.87
	74.6667	121	1.62054	61.67	58.5	0.948597	93	99.6667	1.07168	113.333	180.667	1.59412			Mean	1	1.404	1.208		1.572		1	1.349	1.165	0.968	0.968	0.968			Mean	1	1.243	0.8675	0.8883	0.8883		1	1.315	0.8675		1.041		1	0.9645	0.8675	0.9793	0.9793	0.9793
	138.333	194.667	1.40723	126	97.6667	0.775132	85.3333	115.333	1.35156	91.6	72.6667	0.793304			SD	0.0452	0.1859	0.1763		0.1516		0.09873	0.14	0.04171	0.09377	0.09377	0.09377			SD	0.07217	0.03594	0.02986	0.09549	0.09549		0.1366	0.1326	0.02986		0.1707		0.1617	0.2033	0.02986	0.1048	0.1048	0.1048
	127.333	132	1.03665	105.33	100	0.949397	111.667	88.5	0.792537	89.1667	99.6667	1.11776			SEM	0.0226	0.09296	0.08817		0.07582		0.04936	0.06999	0.02085	0.04688	0.04688	0.04688			SEM	0.03609	0.01797	0.01493	0.04775	0.04775		0.0683	0.06632	0.01493		0.08535		0.08086	0.1017	0.01493	0.05238	0.05238	0.05238
	98	174.33	1.77888	86	78.6667	0.914729	75.5	123.5	1.63576	100.833	102.5	1.01653			CI	0.9281	1.108	0.9272		1.331		0.8431	1.126	1.098		0.8188	0.8188			CI	0.8854	1.185	0.82		0.7363	0.7363	0.7826	1.103	0.82		0.7694		0.7427	0.6409	0.82	0.8125	0.8125
							116.8	103.333	0.884703	91.3333	101.667	1.11314				1.072	1.699	1.488		1.813		1.157	1.572	1.231	0.8188	1.117	1.117				1.115	1.3	0.915	0.7363	1.04	1.04	1.217	1.526	0.915		1.313		1.257	1.288	0.915	1.146	1.146
Mean	109.1	149.8	1.419	98.93	74.23	0.7606	96.23	118.4	1.273	109.5	142	1.292
SD	32.36	32.47	0.2463	21.71	19.03	0.1672	14.44	30.35	0.4351	26.56	48.14	0.3457
SEM	11.44	11.48	0.08707	7.675	6.73	0.05912	4.813	10.12	0.145	8.853	16.05	0.1152
CI	82.09	122.7	1.213	80.78	58.32	0.6208	85.13	95.11	0.9389	89.11	105	1.026
	136.2	177	1.625	117.1	90.14	0.9004	107.3	141.8	1.608	129.9	179	1.558			LC3-II / β-actin															pS6K-T389 / S6K
Statistics															Statistics															Statistics
ANOVA summary															ANOVA summary															ANOVA summary
F				6.635											F				10.77											F				28.7
P value				0.0014											P value				0.001											P value				<0,0001
P value summary				**											P value summary				**											P value summary				****
Significant diff. among means (P < 0.05)?				Yes											Significant diff. among means (P < 0.05)?				Yes											Significant diff. among means (P < 0.05)?				Yes
R square				0.3989											R square				0.7292											R square				0.8777
Brown-Forsythe test															Brown-Forsythe test															Brown-Forsythe test
F (DFn, DFd)				1,596 (3, 30)											F (DFn, DFd)				1,541 (3, 12)											F (DFn, DFd)				0,8610 (3, 12)
P value				0.211											P value				0.2546											P value				0.4877
P value summary				ns											P value summary				ns											P value summary				ns
Are SDs significantly different (P < 0.05)?				No											Are SDs significantly different (P < 0.05)?				No											Are SDs significantly different (P < 0.05)?				No
Bartlett's test															Bartlett's test															Bartlett's test
Bartlett's statistic (corrected)			6.43064												Bartlett's statistic (corrected)			4.36												Bartlett's statistic (corrected)			4.396
P value			0.0924												P value			0.2251												P value			0.2217
P value summary			ns												P value summary			ns												P value summary			ns
Are SDs significantly different (P < 0.05)?			No												Are SDs significantly different (P < 0.05)?			No												Are SDs significantly different (P < 0.05)?			No
ANOVA table			SS	DF	MS	F (DFn, DFd)		P value							ANOVA table			SS	DF	MS	F (DFn, DFd)		P value							ANOVA table			SS	DF	MS	F (DFn, DFd)		P value
Treatment (between columns)			2.051	3	0.6835	F (3, 30) = 6,635		P=0,0014							Treatment (between columns)			0.7325	3	0.2442	F (3, 12) = 10,77		P=0,0010							Treatment (between columns)			0.3554	3	0.1185	F (3, 12) = 28,70	P<0,0001	P<0,0001
Residual (within columns)			3.091	30	0.103										Residual (within columns)			0.2721	12	0.02267										Residual (within columns)			0.04953	12	0.004128
Total			5.141	33											Total			1.005	15											Total			0.4049	15
Data summary			n	Power											Data summary			n	Power											Data summary			n	Power
Number of treatments (columns)			4	0.4209											Number of treatments (columns)			4	0.531											Number of treatments (columns)			4	0.697
Number of values (total)			34												Number of values (total)			16												Number of values (total)			16
Ordinary one-way ANOVA (multiple comparisons)															Ordinary one-way ANOVA (multiple comparisons)															Ordinary one-way ANOVA (multiple comparisons)
Number of families			1												Number of families			1												Number of families			1
Number of comparisons per family			6												Number of comparisons per family			6												Number of comparisons per family			6
Alpha			0.05												Alpha			0.05												Alpha			0.05
Tukey's multiple comparisons test				Mean Diff,	95,00% CI of diff,		Significant?	Summary	Adjusted P Value						Tukey's multiple comparisons test			Mean Diff,	95,00% CI of diff,		Significant?	Summary	Adjusted P Value							Tukey's multiple comparisons test			Mean Diff,	95,00% CI of diff,		Significant?	Summary	Adjusted P Value
(Post-treatment/Pre-treatment) Vehicle vs.THC				0.6584	0,2220 to 1,095		Yes	**	0.0016						Vehicle vs. THC			-0.4035	-0,7196 to -0,08738		Yes	*	0.0119							Vehicle vs. THC			-0.2423	-0,3771 to -0,1074	-0,3771 to -0,1074	Yes	***	0.0009	0.0009
(Post-treatment/Pre-treatment) Vehicle vs. Tem				0.1457	-0,2784 to 0,5697		No	ns	0.7869						Vehicle vs. Tem			-0.2078	-0,5239 to 0,1084		No	ns	0.2589							Vehicle vs. Tem			0.1328	-0,002128 to 0,2676	-0,002128 to 0,2676	No	ns	0.0542	0.0542
(Post-treatment/Pre-treatment) Vehicle vs.Tem+THC				0.1269	-0,2972 to 0,5510		No	ns	0.8476						Vehicle vs. Tem + THC			-0.572	-0,8881 to -0,2559		Yes	***	0.0008							Vehicle vs. Tem + THC			0.112	-0,02288 to 0,2469	-0,02288 to 0,2469	No	ns	0.1169	0.1169
(Post-treatment/Pre-treatment) THC vs.Tem				-0.5127	-0,9368 to -0,08863		Yes	*	0.013						THC vs. Tem			0.1958	-0,1204 to 0,5119		No	ns	0.3034							THC vs. Tem			0.375	0,2401 to 0,5099	0,2401 to 0,5099	Yes	****	<0,0001	<0,0001
(Post-treatment/Pre-treatment) THC vs. Tem+THC				-0.5315	-0,9556 to -0,1074		Yes	**	0.0096						THC vs. Tem + THC			-0.1685	-0,4846 to 0,1476		No	ns	0.4235							THC vs. Tem + THC			0.3543	0,2194 to 0,4891	0,2194 to 0,4891	Yes	****	<0,0001	<0,0001
(Post-treatment/Pre-treatment) Tem vs. Tem+THC				-0.01878	-0,4302 to 0,3926		No	ns	0.9993						Tem vs. Tem + THC			-0.3643	-0,6804 to -0,04813		Yes	*	0.0227							Tem vs. Tem + THC			-0.02075	-0,1556 to 0,1141	-0,1556 to 0,1141	No	ns	0.967	0.967
															Test details			Mean 1	Mean 2	Mean Diff,	SE of diff,	n1	n2	q	DF					Test details			Mean 1	Mean 2	Mean Diff,	SE of diff,	n1	n2	q	DF
Test details				Mean 1	Mean 2	Mean Diff,	SE of diff,	n1	n2	q	DF				Vehicle vs. THC			1	1.404	-0.4035	0.1065	4	4	5.359	12					Vehicle vs. THC			1	1.243	-0.2423	0.04543	4	4	7.541	12
(Post-treatment/Pre-treatment) Vehicle vs.THC				1.419	0.7606	0.6584	0.1605	8	8	5.802	30				Vehicle vs. Tem			1	1.208	-0.2078	0.1065	4	4	2.759	12					Vehicle vs. Tem			1	0.8675	0.1328	0.04543	4	4	4.132	12
(Post-treatment/Pre-treatment) Vehicle vs. Tem				1.419	1.273	0.1457	0.156	8	9	1.321	30				Vehicle vs. Tem + THC			1	1.572	-0.572	0.1065	4	4	7.597	12					Vehicle vs. Tem + THC			1	0.8883	0.112	0.04543	4	4	3.486	12
(Post-treatment/Pre-treatment) Vehicle vs.Tem+THC				1.419	1.292	0.1269	0.156	8	9	1.151	30				THC vs. Tem			1.404	1.208	0.1958	0.1065	4	4	2.6	12					THC vs. Tem			1.243	0.8675	0.375	0.04543	4	4	11.67	12
(Post-treatment/Pre-treatment) THC vs.Tem				0.7606	1.273	-0.5127	0.156	8	9	4.649	30				THC vs. Tem + THC			1.404	1.572	-0.1685	0.1065	4	4	2.238	12					THC vs. Tem + THC			1.243	0.8883	0.3543	0.04543	4	4	11.03	12
(Post-treatment/Pre-treatment) THC vs. Tem+THC				0.7606	1.292	-0.5315	0.156	8	9	4.819	30				Tem vs. Tem + THC			1.208	1.572	-0.3643	0.1065	4	4	4.838	12					Tem vs. Tem + THC			0.8675	0.8883	-0.02075	0.04543	4	4	0.6459	12
(Post-treatment/Pre-treatment) Tem vs. Tem+THC				1.273	1.292	-0.01878	0.1513	9	9	0.1755	30
															p62 / β-actin															pULK1-S757 / ULK1
															Statistics															Statistics
															ANOVA summary															ANOVA summary
															F				12.29											F				8.506
															P value				0.0006											P value				0.0027
															P value summary				***											P value summary				**
															Significant diff. among means (P < 0.05)?				Yes											Significant diff. among means (P < 0.05)?				Yes
															R square				0.7545											R square				0.6802
															Brown-Forsythe test															Brown-Forsythe test
															F (DFn, DFd)				3,114 (3, 12)											F (DFn, DFd)				0,9063 (3, 12)
															P value				0.0666											P value				0.4667
															P value summary				ns											P value summary				ns
															Are SDs significantly different (P < 0.05)?				No											Are SDs significantly different (P < 0.05)?				No
															Bartlett's test															Bartlett's test
															Bartlett's statistic (corrected)			3.208												Bartlett's statistic (corrected)			5.741
															P value			0.3606												P value			0.1249
															P value summary			ns												P value summary			ns
															Are SDs significantly different (P < 0.05)?			No												Are SDs significantly different (P < 0.05)?			No
															ANOVA table			SS	DF	MS	F (DFn, DFd)		P value							ANOVA table			SS	DF	MS	F (DFn, DFd)		P value
															Treatment (between columns)			0.3675	3	0.1225	F (3, 12) = 12,29		P=0,0006							Treatment (between columns)			0.4229	3	0.141	F (3, 12) = 8,506		P=0,0027
															Residual (within columns)			0.1196	12	0.009968										Residual (within columns)			0.1989	12	0.01657
															Total			0.4872	15											Total			0.6217	15
															Data summary			n	Power											Data summary			n	Power
															Number of treatments (columns)			4	0.55											Number of treatments (columns)			4	0.47
															Number of values (total)			16												Number of values (total)			16
															Ordinary one-way ANOVA (multiple comparisons)															Ordinary one-way ANOVA (multiple comparisons)
															Number of families			1												Number of families			1
															Number of comparisons per family			6												Number of comparisons per family			6
															Alpha			0.05												Alpha			0.05
															Tukey's multiple comparisons test			Mean Diff,	95,00% CI of diff,		Significant?	Summary	Adjusted P Value							Tukey's multiple comparisons test			Mean Diff,	95,00% CI of diff,		Significant?	Summary	Adjusted P Value
															Vehicle vs. THC			-0.3488	-0,5584 to -0,1391	-0,5584 to -0,1391	Yes	**	0.0017	0.0017						Vehicle vs. THC			-0.3145	-0,5847 to -0,04426	-0,5847 to -0,04426	Yes	*	0.0214	0.0214
															Vehicle vs. Tem			-0.1645	-0,3741 to 0,04510	-0,3741 to 0,04510	No	ns	0.1454	0.1454						Vehicle vs. Tem			0.1325	-0,1377 to 0,4027	-0,1377 to 0,4027	No	ns	0.4915	0.4915
															Vehicle vs. Tem + THC			0.03225	-0,1774 to 0,2419	-0,1774 to 0,2419	No	ns	0.967	0.967						Vehicle vs. Tem + THC			-0.041	-0,3112 to 0,2292	-0,3112 to 0,2292	No	ns	0.9683	0.9683
															THC vs. Tem			0.1843	-0,02535 to 0,3939	-0,02535 to 0,3939	No	ns	0.0921	0.0921						THC vs. Tem			0.447	0,1768 to 0,7172	0,1768 to 0,7172	Yes	**	0.0018	0.0018
															THC vs. Tem + THC			0.381	0,1714 to 0,5906	0,1714 to 0,5906	Yes	***	0.0008	0.0008						THC vs. Tem + THC			0.2735	0,003257 to 0,5437	0,003257 to 0,5437	Yes	*	0.047	0.047
															Tem vs. Tem + THC			0.1968	-0,01285 to 0,4064	-0,01285 to 0,4064	No	ns	0.0683	0.0683						Tem vs. Tem + THC			-0.1735	-0,4437 to 0,09674	-0,4437 to 0,09674	No	ns	0.2761	0.2761
															Test details			Mean 1	Mean 2	Mean Diff,	SE of diff,	n1	n2	q	DF					Test details			Mean 1	Mean 2	Mean Diff,	SE of diff,	n1	n2	q	DF
															Vehicle vs. THC			1	1.349	-0.3488	0.0706	4	4	6.986	12					Vehicle vs. THC			1	1.315	-0.3145	0.09102	4	4	4.886	12
															Vehicle vs. Tem			1	1.165	-0.1645	0.0706	4	4	3.295	12					Vehicle vs. Tem			1	0.8675	0.1325	0.09102	4	4	2.059	12
															Vehicle vs. Tem + THC			1	0.968	0.03225	0.0706	4	4	0.646	12					Vehicle vs. Tem + THC			1	1.041	-0.041	0.09102	4	4	0.637	12
															THC vs. Tem			1.349	1.165	0.1843	0.0706	4	4	3.691	12					THC vs. Tem			1.315	0.8675	0.447	0.09102	4	4	6.945	12
															THC vs. Tem + THC			1.349	0.968	0.381	0.0706	4	4	7.632	12					THC vs. Tem + THC			1.315	1.041	0.2735	0.09102	4	4	4.249	12
															Tem vs. Tem + THC			1.165	0.968	0.1968	0.0706	4	4	3.941	12					Tem vs. Tem + THC			0.8675	1.041	-0.1735	0.09102	4	4	2.696	12
																														pULK1-S555 / ULK1
																														Statistics
																														ANOVA summary
																														F				0.6948
																														P value				0.5727
																														P value summary				ns
																														Significant diff. among means (P < 0.05)?				No
																														R square				0.148
																														Brown-Forsythe test
																														F (DFn, DFd)				5,661 (3, 12)
																														P value				0.0119
																														P value summary				*
																														Are SDs significantly different (P < 0.05)?				Yes
																														Bartlett's test
																														Bartlett's statistic (corrected)			7.071
																														P value			0.0697
																														P value summary			ns
																														Are SDs significantly different (P < 0.05)?			No
																														ANOVA table			SS	DF	MS	F (DFn, DFd)		P value
																														Treatment (between columns)			0.04136	3	0.01379	F (3, 12) = 0,6948		P=0,5727
																														Residual (within columns)			0.2381	12	0.01984
																														Total			0.2795	15
																														Data summary			n	Power
																														Number of treatments (columns)			4	0.064
																														Number of values (total)			16
																														Ordinary one-way ANOVA (multiple comparisons)
																														Number of families			1
																														Number of comparisons per family			6
																														Alpha			0.05
																														Tukey's multiple comparisons test			Mean Diff,	95,00% CI of diff,		Significant?	Summary	Adjusted P Value
																														Vehicle vs. THC			0.0355	-0,2602 to 0,3312	-0,2602 to 0,3312	No	ns	0.9837	0.9837
																														Vehicle vs. Tem			0.1325	-0,1632 to 0,4282	-0,1632 to 0,4282	No	ns	0.5625	0.5625
																														Vehicle vs. Tem + THC			0.02075	-0,2750 to 0,3165	-0,2750 to 0,3165	No	ns	0.9966	0.9966
																														THC vs. Tem			0.097	-0,1987 to 0,3927	-0,1987 to 0,3927	No	ns	0.7665	0.7665
																														THC vs. Tem + THC			-0.01475	-0,3105 to 0,2810	-0,3105 to 0,2810	No	ns	0.9988	0.9988
																														Tem vs. Tem + THC			-0.1118	-0,4075 to 0,1840	-0,4075 to 0,1840	No	ns	0.6836	0.6836
																														Test details			Mean 1	Mean 2	Mean Diff,	SE of diff,	n1	n2	q	DF
																														Vehicle vs. THC			1	0.9645	0.0355	0.09961	4	4	0.504	12
																														Vehicle vs. Tem			1	0.8675	0.1325	0.09961	4	4	1.881	12
																														Vehicle vs. Tem + THC			1	0.9793	0.02075	0.09961	4	4	0.2946	12
																														THC vs. Tem			0.9645	0.8675	0.097	0.09961	4	4	1.377	12
																														THC vs. Tem + THC			0.9645	0.9793	-0.01475	0.09961	4	4	0.2094	12
																														Tem vs. Tem + THC			0.8675	0.9793	-0.1118	0.09961	4	4	1.587	12

## Sheet: Figure 3 supplement 1
Figure 3-figure supplement 1 - Temsirolimus does not rescue THC-induced hypolocomotion
Ambulation (total distance travelled, cm)												Overall activity (counts)												Resting time (s)												Fast movements (counts)												Stereotypic movements (counts)
Raw Data	Vehicle	THC	Temsirolimus		Temsirolimus + THC							Raw Data	Vehicle	THC	Temsirolimus		Temsirolimus + THC							Raw Data	Vehicle	THC	Temsirolimus		Temsirolimus + THC							Raw Data	Vehicle	THC	Temsirolimus		Temsirolimus + THC							Raw Data	Vehicle
	2240.2	1951.1	2044.5		915.7								1233	1087	1150		572								37.2	88	58		164.6								177.4	150.6	157		62								124
	2375.6	1367.7	2678.2		1207.7								1262	1071	1391	1391	737	737							58.8	78	38	38	126.8	126.8							186.4	145.4	209	209	91	91							119
	2239.7	1344	1929.3		1379.1								1195	1011	1061	1061	913	913							55	93.6	62	62	88.8	88.8							248.6	109.8	142.6	142.6	113.4	113.4							115
	2444.2	977.4	2544.3		1942.4								1335	865	1041	1041	1196	1196							38.6	80.4	64.8	64.8	79.8	79.8							193	95	132.2	132.2	171.8	171.8							148
	2346.5	998.7	2502.2		994.6								1176	813	1301	1301	1050	1050							45.2	160	42	42	77.6	77.6							199.8	77	185.8	185.8	142	142							139
	2025.6	1358	2048.8		1233.7								1085	682	1355	1355	597	597							71	128.6	35.8	35.8	160.6	160.6							244.4	78	194.2	194.2	81.2	81.2							136
			2403.6		1202										1089	1089	797	797									62	62	115.8	115.8									135.4	135.4	96.2	96.2
			2990.3												1359	1359											30.8	30.8											188	188
			2046												1317	1317											34	1317											218.4
Mean	2279	1333	2354		1268							Mean	1214	921.5	1229		837.4							Mean	50.97	104.8	47.49		116.3							Mean	208.3	109.3	173.6		108.2							Mean	130.2
SD	147.3	352.8	359.7		335.5							SD	84.56	161.3	142	230.7	230.7	230.7						SD	13.07	32.66	13.91	36.5	36.5	36.5						SD	30.56	32.36	32.5		37.68							SD	12.83
SEM	60.12	144	119.9		126.8							SEM	34.52	65.85	47.34	87.21	87.21	87.21						SEM	5.338	13.34	4.638	13.79	13.79	13.79						SEM	12.47	13.21	10.83		14.24							SEM	5.237
CI	2124	962.6	2078		957.6							CI	1126	752.2	1120	624	624	624						CI	37.25	70.49	36.79	82.53	82.53	82.53						CI	176.2	75.34	148.6		73.38							CI	116.7
	2433	1703	2631		1578								1303	1091	1338	1051	1051	1051							64.69	139	58.18		150								240.3	143.3	198.6		143.1								143.6
Statistics												Statistics												Statistics												Statistics												Statistics
ANOVA summary												ANOVA summary												ANOVA summary												ANOVA summary												ANOVA summary
F				24.146								F				10.6732								F				13.89								F				14.15								F
P value				<0,0001								P value				0.0001								P value				<0,0001								P value				<0,0001								P value
P value summary				****								P value summary				***								P value summary				****								P value summary				****								P value summary
Significant diff. among means (P < 0.05)?				Yes								Significant diff. among means (P < 0.05)?				Yes								Significant diff. among means (P < 0.05)?				Yes								Significant diff. among means (P < 0.05)?				Yes								Significant diff. among means (P < 0.05)?
R square				0.751135								R square				0.571578								R square				0.6346								R square				0.6388								R square
Brown-Forsythe test												Brown-Forsythe test												Brown-Forsythe test												Brown-Forsythe test												Brown-Forsythe test
F (DFn, DFd)				0,951497 (3, 24)								F (DFn, DFd)				1,63198 (3, 24)								F (DFn, DFd)				2,216 (3, 24)								F (DFn, DFd)				0,06456 (3, 24)								F (DFn, DFd)
P value				0.4315								P value				0.2083								P value				0.1123								P value				0.9781								P value
P value summary				ns								P value summary				ns								P value summary				ns								P value summary				ns								P value summary
Are SDs significantly different (P < 0.05)?				No								Are SDs significantly different (P < 0.05)?				No								Are SDs significantly different (P < 0.05)?				No								Are SDs significantly different (P < 0.05)?				No								Are SDs significantly different (P < 0.05)?
Bartlett's test												Bartlett's test												Bartlett's test												Bartlett's test												Bartlett's test
Bartlett's statistic (corrected)				3.90264								Bartlett's statistic (corrected)				4.6985								Bartlett's statistic (corrected)				9.126								Bartlett's statistic (corrected)				0.266								Bartlett's statistic (corrected)
P value				0.2722								P value				0.1953								P value				0.0277								P value				0.9663								P value
P value summary				ns								P value summary				ns								P value summary				*								P value summary				ns								P value summary
Are SDs significantly different (P < 0.05)?				No								Are SDs significantly different (P < 0.05)?				No								Are SDs significantly different (P < 0.05)?				Yes								Are SDs significantly different (P < 0.05)?				No								Are SDs significantly different (P < 0.05)?
ANOVA table			SS	DF	MS	F (DFn, DFd)		P value				ANOVA table			SS	DF	MS	F (DFn, DFd)		P value				ANOVA table			SS	DF	MS	F (DFn, DFd)		P value				ANOVA table			SS	DF	MS	F (DFn, DFd)		P value				ANOVA table
Treatment (between columns)			7366414	3	2455471	F (3, 24) = 24,1460		P<0,0001				Treatment (between columns)			862704	3	287568	F (3, 24) = 10,6732		P=0,0001				Treatment (between columns)			27320	3	9107	F (3, 24) = 13,89		P<0,0001				Treatment (between columns)			47522	3	15841	F (3, 24) = 14,15		P<0,0001				Treatment (between columns)
Residual (within columns)			2440627	24	101693							Residual (within columns)			646633	24	26943							Residual (within columns)			15730	24	655.4							Residual (within columns)			26873	24	1120							Residual (within columns)
Total			9807041	27								Total			1509336	27								Total			43050	27								Total			74395	27								Total
Data summary			n	Power								Data summary			n	Power								Data summary			n	Power								Data summary			n	Power								Data summary
Number of treatments (columns)			4	0.76								Number of treatments (columns)			4	0.5031								Number of treatments (columns)			4	0.5991								Number of treatments (columns)			4	0.6054								Number of treatments (columns)
Number of values (total)			28									Number of values (total)			28									Number of values (total)			28									Number of values (total)			28									Number of values (total)
Ordinary one-way ANOVA (multiple comparisons)												Ordinary one-way ANOVA (multiple comparisons)												Ordinary one-way ANOVA (multiple comparisons)												Ordinary one-way ANOVA (multiple comparisons)												Ordinary one-way ANOVA (multiple comparisons)
Number of families			1									Number of families			1									Number of families			1									Number of families			1									Number of families
Number of comparisons per family			6									Number of comparisons per family			6									Number of comparisons per family			6									Number of comparisons per family			6									Number of comparisons per family
Alpha			0.05									Alpha			0.05									Alpha			0.05									Alpha			0.05									Alpha
Tukey's multiple comparisons test			Mean Diff,	95,00% CI of diff,		Significant?	Summary	Adjusted P Value				Tukey's multiple comparisons test			Mean Diff,	95,00% CI of diff,		Significant?	Summary	Adjusted P Value				Tukey's multiple comparisons test			Mean Diff,	95,00% CI of diff,		Significant?	Summary	Adjusted P Value				Tukey's multiple comparisons test			Mean Diff,	95,00% CI of diff,		Significant?	Summary	Adjusted P Value				Tukey's multiple comparisons test
Vehicle vs. THC			945.817	437,921 to 1453,71		Yes	***	0.0002				Vehicle vs. THC			292.833	31,4050 to 554,262		Yes	*	0.0241				Vehicle vs. THC			-53.8	-94,57 to -13,03		Yes	**	0.0067				Vehicle vs. THC			98.97	45,67 to 152,3		Yes	***	0.0002				Vehicle vs. THC
Vehicle vs. Tem			-75.5	-539,143 to 388,143		No	ns	0.9691				Vehicle vs. Tem			-15	-253,650 to 223,650		No	ns	0.9981				Vehicle vs. Tem			3.478	-33,74 to 40,70		No	ns	0.9938				Vehicle vs. Tem			34.64	-14,01 to 83,30		No	ns	0.2292				Vehicle vs. Tem
Vehicle vs. Tem + THC			1010.75	521,327 to 1500,17		Yes	****	<0,0001				Vehicle vs. Tem + THC			376.905	124,986 to 628,823		Yes	**	0.002				Vehicle vs. Tem + THC			-65.32	-104,6 to -26,03		Yes	***	0.0006				Vehicle vs. Tem + THC			100	48,68 to 151,4		Yes	****	<0,0001				Vehicle vs. Tem + THC
THC vs. Tem			-1021.32	-1484,96 to -557,673		Yes	****	<0,0001				THC vs. Tem			-307.833	-546,484 to -69,1830		Yes	**	0.0081				THC vs. Tem			57.28	20,06 to 94,50		Yes	**	0.0015				THC vs. Tem			-64.32	-113,0 to -15,67		Yes	**	0.0065				THC vs. Tem
THC vs. Tem + THC			64.931	-424,490 to 554,352		No	ns	0.9828				THC vs. Tem + THC			84.0714	-167,847 to 335,990		No	ns	0.7941				THC vs. Tem + THC			-11.52	-50,81 to 27,77		No	ns	0.8497				THC vs. Tem + THC			1.071	-50,28 to 52,43		No	ns	>0,9999				THC vs. Tem + THC
Tem vs. Tem + THC			1086.25	642,920 to 1529,58		Yes	****	<0,0001				Tem vs. Tem + THC			391.905	163,711 to 620,098		Yes	***	0.0004				Tem vs. Tem + THC			-68.8	-104,4 to -33,21		Yes	****	<0,0001				Tem vs. Tem + THC			65.39	18,87 to 111,9		Yes	**	0.0037				Tem vs. Tem + THC
Test details			Mean 1	Mean 2	Mean Diff,	SE of diff,	n1	n2	q	DF		Test details			Mean 1	Mean 2	Mean Diff,	SE of diff,	n1	n2	q	DF		Test details			Mean 1	Mean 2	Mean Diff,	SE of diff,	n1	n2	q	DF		Test details			Mean 1	Mean 2	Mean Diff,	SE of diff,	n1	n2	q	DF		Test details
Vehicle vs. THC			2278.63	1332.82	945.817	184.113	6	6	7.26503	24		Vehicle vs. THC			1214.33	921.5	292.833	94.7682	6	6	4.36991	24		Vehicle vs. THC			50.97	104.8	-53.8	14.78	6	6	5.148	24		Vehicle vs. THC			208.3	109.3	98.97	19.32	6	6	7.245	24		Vehicle vs. THC
Vehicle vs. Tem			2278.63	2354.13	-75.5	168.071	6	9	0.635284	24		Vehicle vs. Tem			1214.33	1229.33	-15	86.5111	6	9	0.245208	24		Vehicle vs. Tem			50.97	47.49	3.478	13.49	6	9	0.3645	24		Vehicle vs. Tem			208.3	173.6	34.64	17.64	6	9	2.778	24		Vehicle vs. Tem
Vehicle vs. Tem + THC			2278.63	1267.89	1010.75	177.416	6	7	8.05686	24		Vehicle vs. Tem + THC			1214.33	837.429	376.905	91.3209	6	7	5.83682	24		Vehicle vs. Tem + THC			50.97	116.3	-65.32	14.24	6	7	6.486	24		Vehicle vs. Tem + THC			208.3	108.2	100	18.62	6	7	7.599	24		Vehicle vs. Tem + THC
THC vs. Tem			1332.82	2354.13	-1021.32	168.071	6	9	8.59373	24		THC vs. Tem			921.5	1229.33	-307.833	86.5111	6	9	5.03221	24		THC vs. Tem			104.8	47.49	57.28	13.49	6	9	6.003	24		THC vs. Tem			109.3	173.6	-64.32	17.64	6	9	5.158	24		THC vs. Tem
THC vs. Tem + THC			1332.82	1267.89	64.931	177.416	6	7	0.517577	24		THC vs. Tem + THC			921.5	837.429	84.0714	91.3209	6	7	1.30195	24		THC vs. Tem + THC			104.8	116.3	-11.52	14.24	6	7	1.144	24		THC vs. Tem + THC			109.3	108.2	1.071	18.62	6	7	0.08139	24		THC vs. Tem + THC
Tem vs. Tem + THC			2354.13	1267.89	1086.25	160.707	9	7	9.55892	24		Tem vs. Tem + THC			1229.33	837.429	391.905	82.7204	9	7	6.70012	24		Tem vs. Tem + THC			47.49	116.3	-68.8	12.9	9	7	7.541	24		Tem vs. Tem + THC			173.6	108.2	65.39	16.86	9	7	5.484	24		Tem vs. Tem + THC
[truncated: 5 more columns]
