# Supplementary material for: Inhibition of striatonigral autophagy as a link between cannabinoid intoxication and impairment of motor coordination
Source: eLife. 2020 Aug 10;9:e56811. doi: 10.7554/eLife.56811 (PMC7417168; doi:10.7554/eLife.56811)
Supplement: Figure 4—source data 1. [file elife-56811-fig4-data1.xlsx]

## Sheet: Figure 4
Figure 4 with 1 supplement - Trehalose prevents the THC-induced impairment of striatal autophagy and motor coordination in vivo striatal autophagy and motor coordination in vivo impairment of striatal autophagy and motor coordination in vivo.
Figure 4A - Motor coordination (time to fall, s)															Figure 4B - Western blot analysis of autophagy markers in the striatum (optical density values)															Figure 4C - Western blot analysis of mTORC1 signalling pathway markers in the striatum (optical density values)
Raw Data	Vehicle			THC			Trehalose			Trehalose + THC					Raw Data	LC3-II / β-actin						p62 / β-actin								Raw Data	pS6K-T389 / S6K						pULK1-S757 / ULK1						pULK1-S555 / ULK1
	Pre-treatment	Post-treatment	Post-treatment/Pre-treatment	Pre-treatment	Post-treatment	Post-treatment/Pre-treatment	Pre-treatment	Post-treatment	Post-treatment/Pre-treatment	Pre-treatment	Post-treatment	Post-treatment/Pre-treatment				Vehicle	THC	Trehalose		Trehalose + THC		Vehicle	THC	Trehalose		Trehalose + THC					Vehicle	THC	Trehalose		Trehalose + THC		Vehicle	THC	Trehalose		Trehalose + THC		Vehicle	THC	Trehalose		Trehalose + THC
	107.6	129.5	1.20353	104	96.6667	0.929487	72.6667	93	1.27982	66.1667	85	1.28463				0.947	1.345	1.25	1.44	1.44	1.44	0.898	1.22	0.81		0.756	0.756				1.26	1.28	0.82	1.124	1.124	1.124	1.069	1.548	0.928		1.136	1.136	1.015	0.951	0.92		1.051	1.051
	78	90.5	1.16026	70.6667	86.3333	1.2217	70	75.6667	1.08095	59.5	69.5	1.16807				0.879	1.22	1.36	1.4	1.4	1.4	0.941	1.395	0.925		0.82	0.82				1.173	1.34	0.975	1.149	1.149	1.149	1.022	1.26195	0.909		1.079	1.079	0.937	1.01007	0.896		0.91	0.91
	105	124	1.18095	50.3333	52.5	1.04305	98.3333	110	1.11864	81.3333	88.5	1.08811				1.201	1.56	1.42	1.84	1.84	1.84	0.906	1.49	0.82		0.816	0.816				0.775	1.54	0.786	1.252	1.252	1.252	0.964	1.44	0.853		1.268	1.268	1.005	1.08264	0.87		1.076	1.076
	113.736	207	1.82	81.8333	89.6667	1.09572	86.3333	134	1.55212	89.4	140	1.566				0.974	1.4	1.28	1.55	1.55	1.55	1.256	1.533	0.818		0.7	0.7				0.792	1.33	1.181	1.26269	1.26269	1.26269	0.945	1.6065	0.886		0.714979	0.714979	1.043	0.9	0.966		0.949308	0.949308
	139.75	197	1.40966	196.5	171	0.870229	75	85	1.13333	150.333	240	1.59645			Mean	1	1.381	1.328		1.558		1	1.41	0.8433		0.773	0.773			Mean	1	1.373	0.9405	0.9405	1.197	1.197	1	1.464	0.894		1.049	1.049	1	0.9859	0.913		0.9966	0.9966
	125.25	219	1.7485	142	134	0.943662	99.5	110	1.10553	67.5	70	1.03704			SD	0.1397	0.141	0.07719		0.1987		0.1715	0.1389	0.05467		0.05679	0.05679			SD	0.2526	0.1147	0.1802	0.1802	0.07065	0.07065	0.05647	0.1514	0.03228		0.2366	0.2366	0.04497	0.07861	0.04081		0.07958	0.07958
	134	150	1.1194	82.2	86.5	1.05231	127	258	2.0315	115	148	1.28696			SEM	0.06984	0.07049	0.0386		0.09936		0.08576	0.06943	0.02734		0.0284	0.0284			SEM	0.1263	0.05735	0.0901	0.0901	0.03532	0.03532	0.02823	0.0757	0.01614		0.1183	0.1183	0.02249	0.03931	0.0204		0.03979	0.03979
	166	174	1.04819	111.8	129	1.15385	118	162	1.37288	106.25	134.333	1.26431			CI	0.778	1.157	1.205		1.241		0.7273	1.189	0.7563		0.6826	0.6826			CI	0.5981	1.19	0.6538	0.6538	1.085	1.085	0.9101	1.223	0.8426		0.6729	0.6729	0.9284	0.8608	0.8481		0.8699	0.8699
	107.6	160.58	1.49238	156.25	178.5	1.1424	93.25	175	1.87668	93.5	144.5	1.54545				1.223	1.606	1.45		1.874		1.273	1.63	0.9302		0.8634	0.8634				1.402	1.555	1.227	1.227	1.309	1.309	1.09	1.705	0.9454		1.426	1.426	1.072	1.111	0.9779		1.123	1.123
	81.0664	149	1.838	111	135.667	1.22222	185	220	1.18919	71	99	1.39437
	73	87	1.19178	47.25	50.6667	1.07231	71	122	1.71831	77	142.333	1.84848
							111	122	1.0991	134	195.5	1.45896
							96	115	1.19792	124.333	185	1.48794
										183	184.667	1.00911
Mean	112	153.5	1.383	104.9	110.3	1.066	100.2	137.1	1.366	101.3	137.7	1.361
SD	28.42	43.94	0.2981	45.96	43.01	0.1161	31.3	53.51	0.3246	36.19	51.4	0.2419
SEM	8.568	13.25	0.08987	13.86	12.97	0.03501	8.682	14.84	0.09003	9.672	13.74	0.06466
CI	92.91	124	1.182	74.03	81.38	0.9883	81.31	104.7	1.17	80.39	108	1.221
	131.1	183.1	1.583	135.8	139.2	1.144	119.1	169.4	1.562	122.2	167.4	1.5
															LC3-II / β-actin															pS6K-T389 / S6K
Statistics															Statistics															Statistics
ANOVA summary															ANOVA summary															ANOVA summary
F				3.858											F				10.21											F				5.41
P value				0.0154											P value				0.0013											P value				0.0138
P value summary				*											P value summary				**											P value summary				*
Significant diff. among means (P < 0.05)?				Yes											Significant diff. among means (P < 0.05)?				Yes											Significant diff. among means (P < 0.05)?				Yes
R square				0.2046											R square				0.7185											R square				0.5749
Brown-Forsythe test															Brown-Forsythe test															Brown-Forsythe test
F (DFn, DFd)				1,374 (3, 45)											F (DFn, DFd)				0,4029 (3, 12)											F (DFn, DFd)				4,133 (3, 12)
P value				0.2628											P value				0.7536											P value				0.0315
P value summary				ns											P value summary				ns											P value summary				*
Are SDs significantly different (P < 0.05)?				No											Are SDs significantly different (P < 0.05)?				No											Are SDs significantly different (P < 0.05)?				Yes
Bartlett's test															Bartlett's test															Bartlett's test
Bartlett's statistic (corrected)			9.669												Bartlett's statistic (corrected)			2.098												Bartlett's statistic (corrected)			4.198
P value			0.0216												P value			0.5524												P value			0.2409
P value summary			*												P value summary			ns												P value summary			ns
Are SDs significantly different (P < 0.05)?			Yes												Are SDs significantly different (P < 0.05)?			No												Are SDs significantly different (P < 0.05)?			No
ANOVA table			SS	DF	MS	F (DFn, DFd)		P value							ANOVA table			SS	DF	MS	F (DFn, DFd)		P value							ANOVA table			SS	DF	MS	F (DFn, DFd)		P value
Treatment (between columns)			0.7842	3	0.2614	F (3, 45) = 3,858		P=0,0154							Treatment (between columns)			0.6496	3	0.2165	F (3, 12) = 10,21		P=0,0013							Treatment (between columns)			0.4643	3	0.1548	F (3, 12) = 5,410		P=0,0138
Residual (within columns)			3.049	45	0.06775										Residual (within columns)			0.2545	12	0.02121										Residual (within columns)			0.3433	12	0.02861
Total			3.833	48											Total			0.9041	15											Total			0.8076	15
Data summary			n	Power											Data summary			n	Power											Data summary			n	Power
Number of treatments (columns)			4	0.183											Number of treatments (columns)			4	0.507											Number of treatments (columns)			4	0.34
Number of values (total)			49												Number of values (total)			16												Number of values (total)			16
Ordinary one-way ANOVA (multiple comparisons)															Ordinary one-way ANOVA (multiple comparisons)															Ordinary one-way ANOVA (multiple comparisons)
Number of families			1												Number of families			1												Number of families			1
Number of comparisons per family			6												Number of comparisons per family			6												Number of comparisons per family			6
Alpha			0.05												Alpha			0.05												Alpha			0.05
Tukey's multiple comparisons test				Mean Diff,	95,00% CI of diff,		Significant?	Summary	Adjusted P Value						Tukey's multiple comparisons test			Mean Diff,	95,00% CI of diff,		Significant?	Summary	Adjusted P Value							Tukey's multiple comparisons test			Mean Diff,	95,00% CI of diff,		Significant?	Summary	Adjusted P Value
(Post-treatment/Pre-treatment) Vehicle vs.THC				0.3164	0,02029 to 0,6124		Yes	*	0.0321						Vehicle vs. THC			-0.381	-0,6867 to -0,07528	-0,6867 to -0,07528	Yes	*	0.0139	0.0139						Vehicle vs. THC			-0.3725	-0,7276 to -0,01743	-0,7276 to -0,01743	Yes	*	0.0388	0.0388
(Post-treatment/Pre-treatmentl) Vehicle vs. Tre				0.01657	-0,2679 to 0,3010		No	ns	0.9986						Vehicle vs. Tre			-0.3273	-0,6330 to -0,02153	-0,6330 to -0,02153	Yes	*	0.0348	0.0348						Vehicle vs. Tre			0.0595	-0,2956 to 0,4146	-0,2956 to 0,4146	No	ns	0.9581	0.9581
(Post-treatment/Pre-treatment) Vehicle vs.Tre+THC				0.02201	-0,2578 to 0,3018		No	ns	0.9967						Vehicle vs. Tre + THC			-0.5573	-0,8630 to -0,2515	-0,8630 to -0,2515	Yes	***	0.0008	0.0008						Vehicle vs. Tre + THC			-0.1969	-0,5520 to 0,1582	-0,5520 to 0,1582	No	ns	0.3911	0.3911
(Post-treatment/Pre-treatment) THC vs.Tre				-0.2998	-0,5843 to -0,01533		Yes	*	0.0354						THC vs. Tre			0.05375	-0,2520 to 0,3595	-0,2520 to 0,3595	No	ns	0.9522	0.9522						THC vs. Tre			0.432	0,07693 to 0,7871	0,07693 to 0,7871	Yes	*	0.0163	0.0163
(Post-treatment/Pre-treatment) THC vs. Tre+THC				-0.2944	-0,5741 to -0,01458		Yes	*	0.0358						THC vs. Tre + THC			-0.1763	-0,4820 to 0,1295	-0,4820 to 0,1295	No	ns	0.3598	0.3598						THC vs. Tre + THC			0.1756	-0,1795 to 0,5307	-0,1795 to 0,5307	No	ns	0.4846	0.4846
(Post-treatment/Pre-treatment) Tem vs. Tre+THC				0.00544	-0,2620 to 0,2729		No	ns	>0,9999						Tre vs. Tre + THC			-0.23	-0,5357 to 0,07572	-0,5357 to 0,07572	No	ns	0.1693	0.1693						Tre vs. Tre + THC			-0.2564	-0,6115 to 0,09865	-0,6115 to 0,09865	No	ns	0.1944	0.1944
															Test details			Mean 1	Mean 2	Mean Diff,	SE of diff,	n1	n2	q	DF					Test details			Mean 1	Mean 2	Mean Diff,	SE of diff,	n1	n2	q	DF
Test details				Mean 1	Mean 2	Mean Diff,	SE of diff,	n1	n2	q	DF				Vehicle vs. THC			1	1.381	-0.381	0.103	4	4	5.232	12					Vehicle vs. THC			1	1.373	-0.3725	0.1196	4	4	4.405	12
(Post-treatment/Pre-treatment) Vehicle vs.THC				1.383	1.066	0.3164	0.111	11	11	4.031	45				Vehicle vs. Tre			1	1.328	-0.3273	0.103	4	4	4.494	12					Vehicle vs. Tre			1	0.9405	0.0595	0.1196	4	4	0.7036	12
(Post-treatment/Pre-treatmentl) Vehicle vs. Tre				1.383	1.366	0.01657	0.1066	11	13	0.2198	45				Vehicle vs. Tre + THC			1	1.558	-0.5573	0.103	4	4	7.653	12					Vehicle vs. Tre + THC			1	1.197	-0.1969	0.1196	4	4	2.329	12
(Post-treatment/Pre-treatment) Vehicle vs.Tre+THC				1.383	1.361	0.02201	0.1049	11	14	0.2968	45				THC vs. Tre			1.381	1.328	0.05375	0.103	4	4	0.7382	12					THC vs. Tre			1.373	0.9405	0.432	0.1196	4	4	5.108	12
(Post-treatment/Pre-treatment) THC vs.Tre				1.066	1.366	-0.2998	0.1066	11	13	3.976	45				THC vs. Tre + THC			1.381	1.558	-0.1763	0.103	4	4	2.421	12					THC vs. Tre + THC			1.373	1.197	0.1756	0.1196	4	4	2.076	12
(Post-treatment/Pre-treatment) THC vs. Tre+THC				1.066	1.361	-0.2944	0.1049	11	14	3.969	45				Tre vs. Tre + THC			1.328	1.558	-0.23	0.103	4	4	3.159	12					Tre vs. Tre + THC			0.9405	1.197	-0.2564	0.1196	4	4	3.032	12
(Post-treatment/Pre-treatment) Tem vs. Tre+THC				1.366	1.361	0.00544	0.1003	13	14	0.07673	45
															p62 / β-actin															pULK1-S757 / ULK1
															Statistics															Statistics
															ANOVA summary															ANOVA summary
															F				23.66											F				12.03
															P value				<0,0001											P value				0.0006
															P value summary				****											P value summary				***
															Significant diff. among means (P < 0.05)?				Yes											Significant diff. among means (P < 0.05)?				Yes
															R square				0.8554											R square				0.7505
															Brown-Forsythe test															Brown-Forsythe test
															F (DFn, DFd)				0,6311 (3, 12)											F (DFn, DFd)				1,512 (3, 12)
															P value				0.6089											P value				0.2617
															P value summary				ns											P value summary				ns
															Are SDs significantly different (P < 0.05)?				No											Are SDs significantly different (P < 0.05)?				No
															Bartlett's test															Bartlett's test
															Bartlett's statistic (corrected)			4.929												Bartlett's statistic (corrected)			9.955
															P value			0.1771												P value			0.0189
															P value summary			ns												P value summary			*
															Are SDs significantly different (P < 0.05)?			No												Are SDs significantly different (P < 0.05)?			Yes
															ANOVA table			SS	DF	MS	F (DFn, DFd)		P value							ANOVA table			SS	DF	MS	F (DFn, DFd)		P value
															Treatment (between columns)			0.9745	3	0.3248	F (3, 12) = 23,66		P<0,0001							Treatment (between columns)			0.7502	3	0.2501	F (3, 12) = 12,03		P=0,0006
															Residual (within columns)			0.1648	12	0.01373										Residual (within columns)			0.2495	12	0.02079
															Total			1.139	15											Total			0.9997	15
															Data summary			n	Power											Data summary			n	Power
															Number of treatments (columns)			4	0.67											Number of treatments (columns)			4	0.568
															Number of values (total)			16												Number of values (total)			16
															Ordinary one-way ANOVA (multiple comparisons)															Ordinary one-way ANOVA (multiple comparisons)
															Number of families			1												Number of families			1
															Number of comparisons per family			6												Number of comparisons per family			6
															Alpha			0.05												Alpha			0.05
															Tukey's multiple comparisons test			Mean Diff,	95,00% CI of diff,		Significant?	Summary	Adjusted P Value							Tukey's multiple comparisons test			Mean Diff,	95,00% CI of diff,		Significant?	Summary	Adjusted P Value
															Vehicle vs. THC			-0.4093	-0,6552 to -0,1633	-0,6552 to -0,1633	Yes	**	0.0017	0.0017						Vehicle vs. THC			-0.4641	-0,7668 to -0,1614	-0,7668 to -0,1614	Yes	**	0.0032	0.0032
															Vehicle vs. Tre			0.157	-0,08898 to 0,4030	-0,08898 to 0,4030	No	ns	0.2805	0.2805						Vehicle vs. Tre			0.106	-0,1967 to 0,4087	-0,1967 to 0,4087	No	ns	0.7304	0.7304
															Vehicle vs. Tre + THC			0.2273	-0,01873 to 0,4732	-0,01873 to 0,4732	No	ns	0.0736	0.0736						Vehicle vs. Tre + THC			-0.04949	-0,3522 to 0,2532	-0,3522 to 0,2532	No	ns	0.9609	0.9609
															THC vs. Tre			0.5663	0,3203 to 0,8122	0,3203 to 0,8122	Yes	****	<0,0001	<0,0001						THC vs. Tre			0.5701	0,2674 to 0,8728	0,2674 to 0,8728	Yes	***	0.0006	0.0006
															THC vs. Tre + THC			0.6365	0,3905 to 0,8825	0,3905 to 0,8825	Yes	****	<0,0001	<0,0001						THC vs. Tre + THC			0.4146	0,1119 to 0,7173	0,1119 to 0,7173	Yes	**	0.0074	0.0074
															Tre vs. Tre + THC			0.07025	-0,1757 to 0,3162	-0,1757 to 0,3162	No	ns	0.8308	0.8308						Tre vs. Tre + THC			-0.1555	-0,4582 to 0,1472	-0,4582 to 0,1472	No	ns	0.4536	0.4536
															Test details			Mean 1	Mean 2	Mean Diff,	SE of diff,	n1	n2	q	DF					Test details			Mean 1	Mean 2	Mean Diff,	SE of diff,	n1	n2	q	DF
															Vehicle vs. THC			1	1.41	-0.4093	0.08285	4	4	6.985	12					Vehicle vs. THC			1	1.464	-0.4641	0.102	4	4	6.438	12
															Vehicle vs. Tre			1	0.8433	0.157	0.08285	4	4	2.68	12					Vehicle vs. Tre			1	0.894	0.106	0.102	4	4	1.47	12
															Vehicle vs. Tre + THC			1	0.773	0.2273	0.08285	4	4	3.879	12					Vehicle vs. Tre + THC			1	1.049	-0.04949	0.102	4	4	0.6866	12
															THC vs. Tre			1.41	0.8433	0.5663	0.08285	4	4	9.665	12					THC vs. Tre			1.464	0.894	0.5701	0.102	4	4	7.908	12
															THC vs. Tre + THC			1.41	0.773	0.6365	0.08285	4	4	10.86	12					THC vs. Tre + THC			1.464	1.049	0.4146	0.102	4	4	5.751	12
															Tre vs. Tre + THC			0.8433	0.773	0.07025	0.08285	4	4	1.199	12					Tre vs. Tre + THC			0.894	1.049	-0.1555	0.102	4	4	2.157	12
																														pULK1-S555 / ULK1
																														Statistics
																														ANOVA summary
																														F				1.662
																														P value				0.2277
																														P value summary				ns
																														Significant diff. among means (P < 0.05)?				No
																														R square				0.2935
																														Brown-Forsythe test
																														F (DFn, DFd)				1,945 (3, 12)
																														P value				0.1763
																														P value summary				ns
																														Are SDs significantly different (P < 0.05)?				No
																														Bartlett's test
																														Bartlett's statistic (corrected)			1.88
																														P value			0.5977
																														P value summary			ns
																														Are SDs significantly different (P < 0.05)?			No
																														ANOVA table			SS	DF	MS	F (DFn, DFd)		P value
																														Treatment (between columns)			0.0202	3	0.006732	F (3, 12) = 1,662		P=0,2277
																														Residual (within columns)			0.0486	12	0.00405
																														Total			0.0688	15
																														Data summary			n	Power
																														Number of treatments (columns)			4	0.115
																														Number of values (total)			16
																														Ordinary one-way ANOVA (multiple comparisons)
																														Number of families			1
																														Number of comparisons per family			6
																														Alpha			0.05
																														Tukey's multiple comparisons test			Mean Diff,	95,00% CI of diff,		Significant?	Summary	Adjusted P Value
																														Vehicle vs. THC			0.01407	-0,1195 to 0,1477	-0,1195 to 0,1477	No	ns	0.9889
																														Vehicle vs. Tre			0.087	-0,04661 to 0,2206	-0,04661 to 0,2206	No	ns	0.2656
																														Vehicle vs. Tre + THC			0.003423	-0,1302 to 0,1370	-0,1302 to 0,1370	No	ns	0.9998
																														THC vs. Tre			0.07293	-0,06068 to 0,2065	-0,06068 to 0,2065	No	ns	0.4041
																														THC vs. Tre + THC			-0.01065	-0,1443 to 0,1230	-0,1443 to 0,1230	No	ns	0.9951
																														Tre vs. Tre + THC			-0.08358	-0,2172 to 0,05003	-0,2172 to 0,05003	No	ns	0.2957
																														Test details			Mean 1	Mean 2	Mean Diff,	SE of diff,	n1	n2	q	DF
																														Vehicle vs. THC			1	0.9859	0.01407	0.045	4	4	0.4422	12
																														Vehicle vs. Tre			1	0.913	0.087	0.045	4	4	2.734	12
																														Vehicle vs. Tre + THC			1	0.9966	0.003423	0.045	4	4	0.1076	12
																														THC vs. Tre			0.9859	0.913	0.07293	0.045	4	4	2.292	12
																														THC vs. Tre + THC			0.9859	0.9966	-0.01065	0.045	4	4	0.3347	12
																														Tre vs. Tre + THC			0.913	0.9966	-0.08358	0.045	4	4	2.626	12

## Sheet: Figure 4 supplement 1
Figure 4-figure supplement 1 - Trehalose does not rescue THC-induced hypolocomotion
Ambulation (total distance travelled, cm)												Overall activity (counts)												Resting time (s)												Fast movements (counts)												Stereotypic movements (counts)
Raw Data	Vehicle	THC	Trehalose		Trehalose + THC							Raw Data	Vehicle	THC	Trehalose		Trehalose + THC							Raw Data	Vehicle	THC	Trehalose		Trehalose + THC							Raw Data	Vehicle	THC	Trehalose		Trehalose + THC							Raw Data	Vehicle
	2332.8	1237.3	2579.3		2672.8								1204.5	592.5	1168		1230.5								195.6	414	228.6		207								180	91	232.4		197.4								266
	2430.1	1794.4	2968.6	2968.6	1450	1450							1402.5	875.5	1270		1233								151.2	334.4	178		215								208.4	129.6	235.2		235.6								259
	3173.1	1068.28	2570.8	2570.8	1422.2	1422.2							1518.5	1080.5	1524.5		608								154.6	248.8	113.4		201.4								293.4	220	297		153.2								291
	3350.4	2103.2	2368.7	2368.7	1878.5	1878.5							1272	1158	1238.5		913								181	241.6	208.4		423.8								215	162.2	201.6		106.2								285
	2597.5	2664.9	3477.2	3477.2	2328.2	2328.2							1360.5	1223	1422.5		1112								160.8	200	230.4		313.6								280.8	182	201		149.8								293
	2703.2	2566.7	2394.9	2394.9	2156.5	2156.5							1292	1100.5	1201		850.5								177.6	261.8	135.8		252.6								227.2	210.8	288.4		172.4								264
		2314.6	2936.3	2936.3	1718	1718								1117.5	1159		879.5									244.4	216.6		343.4									179.8	247.2		172
			2539.9		863.8										1402.5		865										168		353.8										221		123.2
			3208	3208											1171.5												228												292.6
			2263.2	2263.2											1190.5												219.4												220
Mean	2765	1964	2731	1811	1811	1811						Mean	1342	1021	1275		961.4							Mean	170.1	277.9	192.7		288.8							Mean	234.1	167.9	243.6		163.7							Mean	276.3
SD	409.9	626.6	398.8	575.9	575.9	575.9						SD	110.9	217.4	129		215.3							SD	17.37	72.26	41.95		82.06							SD	44.04	45.29	36.69		40.88							SD	15.02
SEM	167.3	236.8	126.1	203.6	203.6	203.6						SEM	45.26	82.16	40.8		76.11							SEM	7.093	27.31	13.27		29.01							SEM	17.98	17.12	11.6		14.45							SEM	6.13
CI	2334	1385	2445		1330							CI	1225	820	1182		781.5							CI	151.9	211	162.6		220.2							CI	187.9	126	217.4		129.5							CI	260.6
	3195	2544	3016		2293	1330							1458	1222	1367		1141								188.4	344.7	222.7		357.4								280.3	209.8	269.9		197.9								292.1
Statistics												Statistics												Statistics												Statistics												Statistics
ANOVA summary												ANOVA summary												ANOVA summary												ANOVA summary												ANOVA summary
F				7.548								F				8.536								F				7.42								F				8.496								F
P value				0.0008								P value				0.0004								P value				0.0009								P value				0.0004								P value
P value summary				***								P value summary				***								P value summary				***								P value summary				***								P value summary
Significant diff. among means (P < 0.05)?				Yes								Significant diff. among means (P < 0.05)?				Yes								Significant diff. among means (P < 0.05)?				Yes								Significant diff. among means (P < 0.05)?				Yes								Significant diff. among means (P < 0.05)?
R square				0.4561								R square				0.4868								R square				0.4519								R square				0.4856								R square
Brown-Forsythe test												Brown-Forsythe test												Brown-Forsythe test												Brown-Forsythe test												Brown-Forsythe test
F (DFn, DFd)				0,7318 (3, 27)								F (DFn, DFd)				0,5426 (3, 27)								F (DFn, DFd)				2,635 (3, 27)								F (DFn, DFd)				0,05383 (3, 27)								F (DFn, DFd)
P value				0.5421								P value				0.6573								P value				0.0701								P value				0.9832								P value
P value summary				ns								P value summary				ns								P value summary				ns	ns							P value summary				ns								P value summary
Are SDs significantly different (P < 0.05)?				No								Are SDs significantly different (P < 0.05)?				No								Are SDs significantly different (P < 0.05)?				No	No							Are SDs significantly different (P < 0.05)?				No								Are SDs significantly different (P < 0.05)?
Bartlett's test												Bartlett's test												Bartlett's test												Bartlett's test												Bartlett's test
Bartlett's statistic (corrected)				2.024								Bartlett's statistic (corrected)				4.035								Bartlett's statistic (corrected)				11.11								Bartlett's statistic (corrected)				0.3628								Bartlett's statistic (corrected)
P value				0.5675								P value				0.2578								P value				0.0111								P value				0.9478								P value
P value summary				ns								P value summary				ns								P value summary				*								P value summary				ns								P value summary
Are SDs significantly different (P < 0.05)?				No								Are SDs significantly different (P < 0.05)?				No								Are SDs significantly different (P < 0.05)?				Yes								Are SDs significantly different (P < 0.05)?				No								Are SDs significantly different (P < 0.05)?
ANOVA table			SS	DF	MS	F (DFn, DFd)		P value				ANOVA table			SS	DF	MS	F (DFn, DFd)		P value				ANOVA table			SS	DF	MS	F (DFn, DFd)		P value				ANOVA table			SS	DF	MS	F (DFn, DFd)		P value				ANOVA table
Treatment (between columns)			5827547	3	1942516	F (3, 27) = 7,548		P=0,0008				Treatment (between columns)			776966	3	258989	F (3, 27) = 8,536		P=0,0004				Treatment (between columns)			78990	3	26330	F (3, 27) = 7,420		P=0,0009				Treatment (between columns)			43253	3	14418	F (3, 27) = 8,496		P=0,0004				Treatment (between columns)
Residual (within columns)			6948690	27	257359							Residual (within columns)			819237	27	30342							Residual (within columns)			95811	27	3549							Residual (within columns)			45820	27	1697							Residual (within columns)
Total			12776237	30								Total			1596203	30								Total			174801	30								Total			89073	30								Total
Data summary			n	Power								Data summary			n	Power								Data summary			n	Power								Data summary			n	Power								Data summary
Number of treatments (columns)			4	0.4867								Number of treatments (columns)			4	0.5448								Number of treatments (columns)			4	0.4788								Number of treatments (columns)			4	0.5425								Number of treatments (columns)
Number of values (total)			31									Number of values (total)			31									Number of values (total)			31									Number of values (total)			31									Number of values (total)
Ordinary one-way ANOVA (multiple comparisons)												Ordinary one-way ANOVA (multiple comparisons)												Ordinary one-way ANOVA (multiple comparisons)												Ordinary one-way ANOVA (multiple comparisons)												Ordinary one-way ANOVA (multiple comparisons)
Number of families			1									Number of families			1									Number of families			1									Number of families			1									Number of families
Number of comparisons per family			6									Number of comparisons per family			6									Number of comparisons per family			6									Number of comparisons per family			6									Number of comparisons per family
Alpha			0.05									Alpha			0.05									Alpha			0.05									Alpha			0.05									Alpha
Tukey's multiple comparisons test			Mean Diff,	95,00% CI of diff,		Significant?	Summary	Adjusted P Value				Tukey's multiple comparisons test			Mean Diff,	95,00% CI of diff,		Significant?	Summary	Adjusted P Value				Tukey's multiple comparisons test			Mean Diff,	95,00% CI of diff,		Significant?	Summary	Adjusted P Value				Tukey's multiple comparisons test			Mean Diff,	95,00% CI of diff,		Significant?	Summary	Adjusted P Value				Tukey's multiple comparisons test
Vehicle vs. THC			800.3	27,96 to 1573		Yes	*	0.0402				Vehicle vs. THC			320.6	55,39 to 585,8		Yes	*	0.0134				Vehicle vs. THC			-107.7	-198,4 to -17,03		Yes	*	0.0154				Vehicle vs. THC			66.22	3,500 to 128,9		Yes	*	0.0356				Vehicle vs. THC
Vehicle vs. Tre			33.83	-683,1 to 750,7		No	ns	0.9992				Vehicle vs. Tre			66.87	-179,3 to 313,0		No	ns	0.8787				Vehicle vs. Tre			-22.53	-106,7 to 61,65		No	ns	0.8833				Vehicle vs. Tre			-9.507	-67,72 to 48,71		No	ns	0.9697				Vehicle vs. Tre
Vehicle vs. Tre + THC			953.3	203,5 to 1703		Yes	**	0.0088				Vehicle vs. Tre + THC			380.2	122,8 to 637,7		Yes	**	0.0021				Vehicle vs. Tre + THC			-118.7	-206,7 to -30,65		Yes	**	0.0052				Vehicle vs. Tre + THC			70.41	9,525 to 131,3		Yes	*	0.0188				Vehicle vs. Tre + THC
THC vs. Tre			-766.5	-1451 to -82,34		Yes	*	0.0237				THC vs. Tre			-253.7	-488,6 to -18,82		Yes	*	0.0306				THC vs. Tre			85.2	4,862 to 165,5		Yes	*	0.0346				THC vs. Tre			-75.73	-131,3 to -20,17		Yes	**	0.0047				THC vs. Tre
THC vs. Tre + THC			152.9	-565,6 to 871,4		No	ns	0.9365				THC vs. Tre + THC			59.63	-187,1 to 306,3		No	ns	0.9106				THC vs. Tre + THC			-10.97	-95,34 to 73,40		No	ns	0.9842				THC vs. Tre + THC			4.189	-54,16 to 62,53		No	ns	0.9972				THC vs. Tre + THC
Tre vs. Tre + THC			919.4	260,9 to 1578		Yes	**	0.0037				Tre vs. Tre + THC			313.4	87,25 to 539,5		Yes	**	0.004				Tre vs. Tre + THC			-96.17	-173,5 to -18,84		Yes	*	0.0106				Tre vs. Tre + THC			79.92	26,44 to 133,4		Yes	**	0.0019				Tre vs. Tre + THC
Test details			Mean 1	Mean 2	Mean Diff,	SE of diff,	n1	n2	q	DF		Test details			Mean 1	Mean 2	Mean Diff,	SE of diff,	n1	n2	q	DF		Test details			Mean 1	Mean 2	Mean Diff,	SE of diff,	n1	n2	q	DF		Test details			Mean 1	Mean 2	Mean Diff,	SE of diff,	n1	n2	q	DF		Test details
Vehicle vs. THC			2765	1964	800.3	282.2	6	7	4.01	27		Vehicle vs. THC			1342	1021	320.6	96.91	6	7	4.678	27		Vehicle vs. THC			170.1	277.9	-107.7	33.14	6	7	4.597	27		Vehicle vs. THC			234.1	167.9	66.22	22.92	6	7	4.086	27		Vehicle vs. THC
Vehicle vs. Tre			2765	2731	33.83	262	6	10	0.1826	27		Vehicle vs. Tre			1342	1275	66.87	89.95	6	10	1.051	27		Vehicle vs. Tre			170.1	192.7	-22.53	30.76	6	10	1.036	27		Vehicle vs. Tre			234.1	243.6	-9.507	21.27	6	10	0.632	27		Vehicle vs. Tre
Vehicle vs. Tre + THC			2765	1811	953.3	274	6	8	4.921	27		Vehicle vs. Tre + THC			1342	961.4	380.2	94.07	6	8	5.716	27		Vehicle vs. Tre + THC			170.1	288.8	-118.7	32.17	6	8	5.218	27		Vehicle vs. Tre + THC			234.1	163.7	70.41	22.25	6	8	4.476	27		Vehicle vs. Tre + THC
THC vs. Tre			1964	2731	-766.5	250	7	10	4.336	27		THC vs. Tre			1021	1275	-253.7	85.84	7	10	4.18	27		THC vs. Tre			277.9	192.7	85.2	29.36	7	10	4.104	27		THC vs. Tre			167.9	243.6	-75.73	20.3	7	10	5.275	27		THC vs. Tre
THC vs. Tre + THC			1964	1811	152.9	262.6	7	8	0.8238	27		THC vs. Tre + THC			1021	961.4	59.63	90.15	7	8	0.9355	27		THC vs. Tre + THC			277.9	288.8	-10.97	30.83	7	8	0.5031	27		THC vs. Tre + THC			167.9	163.7	4.189	21.32	7	8	0.2779	27		THC vs. Tre + THC
Tre vs. Tre + THC			2731	1811	919.4	240.6	10	8	5.404	27		Tre vs. Tre + THC			1275	961.4	313.4	82.63	10	8	5.363	27		Tre vs. Tre + THC			192.7	288.8	-96.17	28.26	10	8	4.813	27		Tre vs. Tre + THC			243.6	163.7	79.92	19.54	10	8	5.784	27		Tre vs. Tre + THC
[truncated: 3 more columns]
