# Supplementary material for: Inhibition of striatonigral autophagy as a link between cannabinoid intoxication and impairment of motor coordination
Source: eLife. 2020 Aug 10;9:e56811. doi: 10.7554/eLife.56811 (PMC7417168; doi:10.7554/eLife.56811)
Supplement: Figure 5—source data 1. [file elife-56811-fig5-data1.xlsx]

## Sheet: Figure 5
Figure 5 - Cannabinoid CB1 receptors located on D1R-MSNs, but not on glutamatergic neurons, are required for the THC-induced impairment of striatal autophagy and motor coordination in vivo impairment of striatal autophagy and motor coordination in vivo. striatal autophagy and motor coordination in vivo impairment of striatal autophagy and motor coordination in vivo.
Figure 5A - Motor coordination (time to fall, s)															Figure 5B - Western blot analysis of autophagy markers in the striatum (optical density, arbitrary units)														Figure 5C - p62 fluorescence intensity per DARPP32-positive cell in the dorsal striatum (arbitrary units)													Figure 5D - Motor coordination (time to fall, s)
Raw Data	CB1Rfloxed/floxed						D1R-CB1R-/-								Raw Data	LC3-II / β-actin				p62 / β-actin									Raw Data	CB1Rfloxed/floxed		D1R-CB1R-/-										Raw Data	CB1Rfloxed/floxed						Glu-CB1R-/-
	Vehicle	Vehicle		THC			Vehicle	Vehicle		THC						CB1Rfloxed/floxed		D1R-CB1R-/-		CB1Rfloxed/floxed		D1R-CB1R-/-								Vehicle	THC	Vehicle	THC										Vehicle	Vehicle		THC			Vehicle
	Pre-treatment	Post-treatment	Post-treatment/Pre-treatment	Pre-treatment	Post-treatment	Post-treatment/Pre-treatment	Pre-treatment	Post-treatment	Post-treatment/Pre-treatment	Pre-treatment	Post-treatment	Post-treatment/Pre-treatment				Vehicle	THC	Vehicle	THC	Vehicle	THC	Vehicle	THC							0.82	1.73807	0.752828	1.12643										Pre-treatment	Post-treatment	Post-treatment/Pre-treatment	Pre-treatment	Post-treatment	Post-treatment/Pre-treatment	Pre-treatment
	102.6	134.667	1.31254	106.667	105.5	0.989062	86.6	100.5	1.16051	93.8	125	1.33262				0.992679	2.007	1.28552	1.08	1.2749	1.39698	1.05026	0.845631							1	1.69473	0.723896	1.15361										154.286	162	1.05	243.13	151	0.621067	147.667
	172	242	1.40698	119.2	119.333	1.00112	83.8	90.6667	1.08194	130.6	158.667	1.21491				0.929573	1.52721	1.27913	0.903	0.981579	1.33184	0.95	0.98							1.084	1.62652	1.14982	0.627749										157.669	159	1.00844	109.542	82	0.748571	276.667
	160	242.5	1.51562	125.167	110.5	0.882823	112	163.333	1.45833	86	73.3333	0.852713				1.01656	1.17643	1.05595	1.268	0.957472	1.31066	1.05599	0.837898							1.097	1.64717	0.84551	0.972903										122.285	143	1.1694	220.14	155	0.704097	44.6309
	76	83.5	1.09868	181.5	97	0.534435	157.4	210	1.33418	135.25	194	1.43438				1.02931	1.2	1.13183	1.05	0.871928	1.46035	1.05733	0.903939						Mean	1	1.677	0.868	0.9702										158.333	172	1.08632	142.667	102	0.714953	138
	87.25	154.667	1.77268	91.8	67.3333	0.733479	222.5	258	1.15955	121	131.667	1.08815				1.03188	1.69162	1.23853	0.92	0.914122	1.46058	1.07204	1.21291						SD	0.1276	0.04994	0.1949	0.2417										148.296	167	1.12613	72.9024	49	0.672131	182.243
	84	96.3333	1.14683	105.25	55.3333	0.525732	148	171	1.15541	49.5	79	1.59596			Mean	1	1.52	1.198	1.044	1	1.392	1.037	0.9561						SEM	0.06381	0.02497	0.09745	0.1209									Mean	148	160.6	1.09	157.8	107.8	0.69	158
	99	93	0.939394	70	53.9	0.77	37	45	1.21622	111.167	186.667	1.67916			SD	0.04232	0.349	0.1005	0.1473	0.1593	0.07006	0.04936	0.1545						CI	0.7972	1.597	0.5579	0.5855									SD	15.1	11.01	0.06325	72.15	45.42	0.04848	83.67
Mean	111.6	149.7	1.314	114.3	87	0.7757	121.1	148.4	1.224	104	135.6	1.313			SEM	0.01892	0.1561	0.04497	0.06587	0.07124	0.03133	0.02208	0.06907							1.203	1.756	1.178	1.355									SEM	6.753	4.925	0.02828	32.27	20.31	0.02168	37.42
SD	38.42	68.17	0.2805	34.93	27.61	0.1958	60.68	73.9	0.1291	29.91	48.04	0.2903			CI	0.9475	1.087	1.073	0.8613	0.8022	1.305	0.9758	0.7643																			CI	129.3	146.9	1.011	68.21	51.41	0.6298	54.1
SEM	14.52	25.77	0.106	13.2	10.44	0.074	22.93	27.93	0.04879	11.31	18.16	0.1097				1.053	1.954	1.323	1.227	1.198	1.479	1.098	1.148																				166.7	174.3	1.169	247.4	164.2	0.7502	261.9
CI	76.04	86.67	1.055	81.98	61.46	0.5947	65.03	80.09	1.105	76.34	91.14	1.044
	147.1	212.8	1.574	146.6	112.5	0.9568	177.3	216.8	1.344	131.7	180	1.581
															LC3-II / β-actin
Statistics															Statistics														Statistics													Statistics
Two-way ANOVA		Ordinary													Two-way ANOVA		Ordinary												Two-way ANOVA		Ordinary											Two-way ANOVA		Ordinary
Alpha		0.05													Alpha		0.05												Alpha		0.05											Alpha		0.05
Source of Variation		% of total variation	P value	P value summary		Significant?									Source of Variation		% of total variation		P value	P value summary		Significant?							Source of Variation		% of total variation		P value	P value summary		Significant?						Source of Variation		% of total variation	P value	P value summary		Significant?
Row Factor		1.346	0.997	ns		No									Row Factor		9.909		0.491	ns		No							Row Factor		0.1549		0.9936	ns		No						Row Factor		0.6304	0.8531	ns		No
Column Factor		51.57	0.0034	**		Yes									Column Factor		57.27		0.0057	**		Yes							Column Factor		82.59		0.0009	***		Yes						Column Factor		93.62	<0,0001	****		Yes
ANOVA table		SS	DF	MS	F (DFn, DFd)		P value								ANOVA table		SS	DF	MS	F (DFn, DFd)		P value							ANOVA table		SS	DF	MS	F (DFn, DFd)		P value						ANOVA table		SS	DF	MS	F (DFn, DFd)		P value
Row Factor		0.03634	6	0.006056	F (6, 18) = 0,08573		P=0,9970								Row Factor		0.1441	4	0.03603	F (4, 12) = 0,9059		P=0,4910							Row Factor		0.003074	3	0.001025	F (3, 9) = 0,02692		P=0,9936						Row Factor		0.00827	4	0.002068	F (4, 12) = 0,3292		P=0,8531
Column Factor		1.393	3	0.4642	F (3, 18) = 6,571		P=0,0034								Column Factor		0.8331	3	0.2777	F (3, 12) = 6,981		P=0,0057							Column Factor		1.639	3	0.5464	F (3, 9) = 14,36		P=0,0009						Column Factor		1.228	3	0.4094	F (3, 12) = 65,18		P<0,0001
Residual		1.272	18	0.07064											Residual		0.4773	12	0.03978										Residual		0.3426	9	0.03806									Residual		0.07537	12	0.006281
R2		0.529123													R2		0.671846												R2		0.827377											R2		0.942538
Two-way ANOVA (multiple comparisons)															Two-way ANOVA (multiple comparisons)														Two-way ANOVA (multiple comparisons)													Two-way ANOVA (multiple comparisons)
Number of families			1	Power											Number of families			1	Power										Number of families			1	Power									Number of families			1	Power
Number of comparisons per family			6	0.8898											Number of comparisons per family			6	0.592										Number of comparisons per family			6	0.649									Number of comparisons per family			6	0.999
Alpha			0.05												Alpha			0.05											Alpha			0.05										Alpha			0.05
Tukey's multiple comparisons test				Mean Diff,	95,00% CI of diff,		Significant?	Summary	Adjusted P Value						Tukey's multiple comparisons test				Mean Diff,	95,00% CI of diff,		Significant?	Summary	Adjusted P Value					Tukey's multiple comparisons test				Mean Diff,	95,00% CI of diff,		Significant?	Summary	Adjusted P Value				Tukey's multiple comparisons test				Mean Diff,	95,00% CI of diff,		Significant?
(Post-treatment/Pre-treatment) Vehicle CB1Rfl/fl vs.THC CB1Rfl/fl				0.5386	0,1371 to 0,9401		Yes	**	0.0067						Vehicle CB1Rfl/fl vs.THC CB1Rfl/fl				-0.5205	-0,8950 to -0,1460		Yes	**	0.0066	0.0066				Vehicle CB1Rfl/fl vs.THC CB1Rfl/fl				-0.6764	-1,107 to -0,2457		Yes	**	0.0038				(Post-treatment/Pre-treatment) Vehicle CB1Rfl/fl vs.THC CB1Rfl/fl				0.4	0,2512 to 0,5488		Yes
(Post-treatment/Pre-treatment) Vehicle CB1Rfl/fl vs. Vehicle D1R-CB1R-/-			8.9514	0.09	-0,3115 to 0,4915		No	ns	0.9198						Vehicle CB1Rfl/fl vs. Vehicle D1R-CB1R-/-				-0.1982	-0,5727 to 0,1763		No	ns	0.4293	0.4293				Vehicle CB1Rfl/fl vs. Vehicle D1R-CB1R-/-				0.1322	-0,2984 to 0,5629		No	ns	0.7753				(Post-treatment/pre-treatment) Vehicle CB1Rfl/fl vs. Vehicle Glu-CB1R-/-			8.9514	0.014	-0,1348 to 0,1628		No
(Post-treatment/Pre-treatment) Vehicle CB1Rfl/fl vs. THC D1R-CB1R-/-			8.9514	0.001429	-0,4001 to 0,4029		No	ns	>0,9999						Vehicle CB1Rfl/fl vs. THC D1R-CB1R-/-				-0.0442	-0,4187 to 0,3303		No	ns	0.9845	0.9845				Vehicle CB1Rfl/fl vs. THC D1R-CB1R-/-				0.03008	-0,4006 to 0,4607		No	ns	0.9961				(Post-treatment/Pre-treatment) Vehicle CB1Rfl/fl vs. THC Glu-CB1R-/-			8.9514	0.574	0,4252 to 0,7228		Yes
(Post-treatment/Pre-treatment) THC CB1Rfl/fl vs. Vehicle D1R-CB1R-/-			8.9514	-0.4486	-0,8501 to -0,04705		Yes	*	0.0255						THC CB1Rfl/fl vs. Vehicle D1R-CB1R-/-				0.3223	-0,05224 to 0,6968		No	ns	0.1009	0.1009				THC CB1Rfl/fl vs. Vehicle D1R-CB1R-/-				0.8086	0,3779 to 1,239		Yes	**	0.0011				(Post-treatment/Pre-treatment) THC CB1Rfl/fl vs. Vehicle Glu-CB1R-/-			8.9514	-0.386	-0,5348 to -0,2372		Yes
(Post-treatment/Pre-treatment) THC CB1Rfl/fl vs. THC D1R-CB1R-/-			8.9514	-0.5371	-0,9387 to -0,1356		Yes	**	0.0068						THC CB1Rfl/fl vs. THC D1R-CB1R-/-				0.4763	0,1018 to 0,8508		Yes	*	0.0122	0.0122				THC CB1Rfl/fl vs. THC D1R-CB1R-/-				0.7064	0,2758 to 1,137		Yes	**	0.0029				(Post-treatment/Pre-treatment) THC CB1Rfl/fl vs. THC Glu-CB1R-/-			8.9514	0.174	0,02519 to 0,3228		Yes
(Post-treatment/Pre-treatment) Vehicle D1R-CB1R-/- vs. THC D1R-CB1R-/-			8.9514	-0.08857	-0,4901 to 0,3129		No	ns	0.9232						Vehicle D1R-CB1R-/- vs. THC D1R-CB1R-/-				0.154	-0,2205 to 0,5285		No	ns	0.6262	0.6262				Vehicle D1R-CB1R-/- vs. THC D1R-CB1R-/-				-0.1022	-0,5328 to 0,3285		No	ns	0.8784				(Post-treatment/Pre-treatment) Vehicle Glu-CB1R-/- vs. THC Glu-CB1R-/-			8.9514	0.56	0,4112 to 0,7088		Yes
																													Test details				Mean 1	Mean 2	Mean Diff,	SE of diff,	n1	n2	q	DF
Test details				Mean 1	Mean 2	Mean Diff,	SE of diff,	n1	n2	q	DF				Test details				Mean 1	Mean 2	Mean Diff,	SE of diff,	n1	n2	q	DF			Vehicle CB1Rfl/fl vs.THC CB1Rfl/fl				1	1.677	-0.6764	0.138	4	4	6.934	9		Test details				Mean 1	Mean 2	Mean Diff,	SE of diff,
(Post-treatment/Pre-treatment) Vehicle CB1Rfl/fl vs.THC CB1Rfl/fl				1.314	0.7757	0.5386	0.1421	7	7	5.361	18				Vehicle CB1Rfl/fl vs.THC CB1Rfl/fl				1	1.52	-0.5205	0.1261	5	5	5.835	12			Vehicle CB1Rfl/fl vs. Vehicle D1R-CB1R-/-				1	0.868	0.1322	0.138	4	4	1.356	9		(Post-treatment/Pre-treatment) Vehicle CB1Rfl/fl vs.THC CB1Rfl/fl				1.09	0.69	0.4	0.05012
(Post-treatment/Pre-treatment) Vehicle CB1Rfl/fl vs. Vehicle D1R-CB1R-/-			8.9514	1.314	1.224	0.09	0.1421	7	7	0.8959	18				Vehicle CB1Rfl/fl vs. Vehicle D1R-CB1R-/-				1	1.198	-0.1982	0.1261	5	5	2.222	12			Vehicle CB1Rfl/fl vs. THC D1R-CB1R-/-				1	0.9702	0.03008	0.138	4	4	0.3083	9		(Post-treatment/pre-treatment) Vehicle CB1Rfl/fl vs. Vehicle Glu-CB1R-/-			8.9514	1.09	1.076	0.014	0.05012
(Post-treatment/Pre-treatment) Vehicle CB1Rfl/fl vs. THC D1R-CB1R-/-			8.9514	1.314	1.313	0.001429	0.1421	7	7	0.01422	18				Vehicle CB1Rfl/fl vs. THC D1R-CB1R-/-				1	1.044	-0.0442	0.1261	5	5	0.4955	12			THC CB1Rfl/fl vs. Vehicle D1R-CB1R-/-				1.677	0.868	0.8086	0.138	4	4	8.289	9		(Post-treatment/Pre-treatment) Vehicle CB1Rfl/fl vs. THC Glu-CB1R-/-			8.9514	1.09	0.516	0.574	0.05012
(Post-treatment/Pre-treatment) THC CB1Rfl/fl vs. Vehicle D1R-CB1R-/-			8.9514	0.7757	1.224	-0.4486	0.1421	7	7	4.465	18				THC CB1Rfl/fl vs. Vehicle D1R-CB1R-/-				1.52	1.198	0.3223	0.1261	5	5	3.613	12			THC CB1Rfl/fl vs. THC D1R-CB1R-/-				1.677	0.9702	0.7064	0.138	4	4	7.242	9		(Post-treatment/Pre-treatment) THC CB1Rfl/fl vs. Vehicle Glu-CB1R-/-			8.9514	0.69	1.076	-0.386	0.05012
(Post-treatment/Pre-treatment) THC CB1Rfl/fl vs. THC D1R-CB1R-/-			8.9514	0.7757	1.313	-0.5371	0.1421	7	7	5.347	18				THC CB1Rfl/fl vs. THC D1R-CB1R-/-				1.52	1.044	0.4763	0.1261	5	5	5.339	12			Vehicle D1R-CB1R-/- vs. THC D1R-CB1R-/-				0.868	0.9702	-0.1022	0.138	4	4	1.047	9		(Post-treatment/Pre-treatment) THC CB1Rfl/fl vs. THC Glu-CB1R-/-			8.9514	0.69	0.516	0.174	0.05012
(Post-treatment/Pre-treatment) Vehicle D1R-CB1R-/- vs. THC D1R-CB1R-/-			8.9514	1.224	1.313	-0.08857	0.1421	7	7	0.8817	18				Vehicle D1R-CB1R-/- vs. THC D1R-CB1R-/-				1.198	1.044	0.154	0.1261	5	5	1.726	12																(Post-treatment/Pre-treatment) Vehicle Glu-CB1R-/- vs. THC Glu-CB1R-/-			8.9514	1.076	0.516	0.56	0.05012
															p62 / β-actin
															Statistics
															Two-way ANOVA		Ordinary
															Alpha		0.05
															Source of Variation		% of total variation		P value	P value summary		Significant?
															Row Factor		5.659		0.5588	ns		No
															Column Factor		72.6		0.0004	***		Yes
															ANOVA table		SS	DF	MS	F (DFn, DFd)		P value
															Row Factor		0.04674	4	0.01169	F (4, 12) = 0,7810		P=0,5588
															Column Factor		0.5996	3	0.1999	F (3, 12) = 13,36		P=0,0004
															Residual		0.1796	12	0.01496
															R2		0.782551
															Two-way ANOVA (multiple comparisons)
															Number of families			1	Power
															Number of comparisons per family			6	0.673
															Alpha			0.05
															Tukey's multiple comparisons test				Mean Diff,	95,00% CI of diff,		Significant?	Summary	Adjusted P Value
															Vehicle CB1Rfl/fl vs.THC CB1Rfl/fl				-0.3921	-0,6218 to -0,1624		Yes	**	0.0014
															Vehicle CB1Rfl/fl vs. Vehicle D1R-CB1R-/-				-0.03712	-0,2668 to 0,1926		No	ns	0.9621
															Vehicle CB1Rfl/fl vs. THC D1R-CB1R-/-				0.04392	-0,1858 to 0,2736		No	ns	0.9398
															THC CB1Rfl/fl vs. Vehicle D1R-CB1R-/-				0.355	0,1253 to 0,5846		Yes	**	0.003
															THC CB1Rfl/fl vs. THC D1R-CB1R-/-				0.436	0,2063 to 0,6657		Yes	***	0.0005
															Vehicle D1R-CB1R-/- vs. THC D1R-CB1R-/-				0.08105	-0,1486 to 0,3107		No	ns	0.7259
															Test details				Mean 1	Mean 2	Mean Diff,	SE of diff,	n1	n2	q	DF
															Vehicle CB1Rfl/fl vs.THC CB1Rfl/fl				1	1.392	-0.3921	0.07736	5	5	7.167	12
															Vehicle CB1Rfl/fl vs. Vehicle D1R-CB1R-/-				1	1.037	-0.03712	0.07736	5	5	0.6786	12
															Vehicle CB1Rfl/fl vs. THC D1R-CB1R-/-				1	0.9561	0.04392	0.07736	5	5	0.8029	12
															THC CB1Rfl/fl vs. Vehicle D1R-CB1R-/-				1.392	1.037	0.355	0.07736	5	5	6.489	12
															THC CB1Rfl/fl vs. THC D1R-CB1R-/-				1.392	0.9561	0.436	0.07736	5	5	7.97	12
															Vehicle D1R-CB1R-/- vs. THC D1R-CB1R-/-				1.037	0.9561	0.08105	0.07736	5	5	1.482	12
[truncated: 22 more columns]

## Sheet: Figure 5 Supplement 1
Figure 5 supplement 1 - Rimonabant rescues THC-induced motor dyscoordination
Supplement 1 - Motor coordination (time to fall, s)
Raw Data	Vehicle			THC			SR			SR + THC
	Pre-treatment	Post-treatment	Post-treatment/Pre-treatment	Pre-treatment	Post-treatment	Post-treatment/Pre-treatment	Pre-treatment	Post-treatment	Post-treatment/Pre-treatment	Pre-treatment	Post-treatment	Post-treatment/Pre-treatment
	117	137	1.17094	64	51	0.796875	116	155	1.33621	118	130	1.10169
	95	93	0.978947	89	72	0.808989	79	106	1.34177	67	98	1.46269
	87	120	1.37931	125	79	0.632	106	137	1.29245	101	141	1.39604
	126	148	1.1746	97	100	1.03093	87	101	1.16092	98	136	1.38776
	87	132	1.51724	84	65	0.77381	86	104	1.2093	82	121	1.47561
Mean	102.4	126	1.245	91.8	73.4	0.812	94.8	120.6	1.267	93.2	125.2	1.367
SD	18.02	21.01	0.2117	22.2	18.12	0.1425	15.51	24.11	0.08227	19.43	16.93	0.15
SEM	8.06	9.397	0.09468	9.927	8.103	0.06372	6.938	10.78	0.03679	8.691	7.572	0.06709
CI	80.02	99.91	0.9825	64.24	50.9	0.6351	75.54	90.66	1.165	69.07	104.2	1.181
	124.8	152.1	1.508	119.4	95.9	0.9889	114.1	150.5	1.37	117.3	146.2	1.553
Statistics
ANOVA summary
F			12.86
P value			0.0002
P value summary			***
Significant diff. among means (P < 0.05)?			Yes
R square			0.7068
Brown-Forsythe test
F (DFn, DFd)			0,5739 (3, 16)
P value			0.6403
P value summary			ns
Are SDs significantly different (P < 0.05)?			No
Bartlett's test
Bartlett's statistic (corrected)			2.918
P value			0.4045
P value summary			ns
Are SDs significantly different (P < 0.05)?			No
ANOVA table			SS	DF	MS	F (DFn, DFd)	P value
Treatment (between columns)			0.9104	3	0.3035	F (3, 16) = 12,86	P=0,0002
Residual (within columns)			0.3776	16	0.0236
Total			1.288	19
Data summary
Number of treatments (columns)			4
Number of values (total)			20
Ordinary one-way ANOVA (multiple comparisons)
Number of families			1	Power
Number of comparisons per family			6	0.648
Alpha			0.05
Tukey's multiple comparisons test				Mean Diff,	95,00% CI of diff,		Significant?	Summary	Adjusted P Value
(Post-treatmente/Pre-treatment) Vehicle vs. THC				0.4334	0,1555 to 0,7114		Yes	**	0.002
(Post-treatmente/Pre-treatment) Vehicle vs. SR				-0.02197	-0,2999 to 0,2560		No	ns	0.9958
(Post-treatmente/Pre-treatment) Vehicle vs. SR+THC				-0.1215	-0,3994 to 0,1565		No	ns	0.6057
(Post-treatmente/Pre-treatment) THC vs. SR				-0.4554	-0,7334 to -0,1774		Yes	**	0.0013
(Post-treatmente/Pre-treatment) THC vs. SR+THC				-0.5549	-0,8329 to -0,2769		Yes	***	0.0002
(Post-treatmente/Pre-treatment) SR vs. SR+THC				-0.09948	-0,3774 to 0,1785		No	ns	0.7382
Test details				Mean 1	Mean 2	Mean Diff,	SE of diff,	n1	n2	q	DF
(Post-treatmente/Pre-treatment) Vehicle vs. THC				1.245	0.812	0.4334	0.09716	5	5	6.309	16
(Post-treatmente/Pre-treatment) Vehicle vs. SR				1.245	1.267	-0.02197	0.09716	5	5	0.3198	16
(Post-treatmente/Pre-treatment) Vehicle vs. SR+THC				1.245	1.367	-0.1215	0.09716	5	5	1.768	16
(Post-treatmente/Pre-treatment) THC vs. SR				0.812	1.267	-0.4554	0.09716	5	5	6.629	16
(Post-treatmente/Pre-treatment) THC vs. SR+THC				0.812	1.367	-0.5549	0.09716	5	5	8.077	16
(Post-treatmente/Pre-treatment) SR vs. SR+THC				1.267	1.367	-0.09948	0.09716	5	5	1.448	16
