# Supplementary material for: Inhibition of striatonigral autophagy as a link between cannabinoid intoxication and impairment of motor coordination
Source: eLife. 2020 Aug 10;9:e56811. doi: 10.7554/eLife.56811 (PMC7417168; doi:10.7554/eLife.56811)
Supplement: Figure 6—source data 1. [file elife-56811-fig6-data1.xlsx]

## Sheet: Figure 6
Figure 6 with 1 supplement - mTORC1 and p62 in D1R-MSNs participate in the THC-induced impairment of motor coordination in vivo participate in the THC-induced impairment of motor Figure 6 with 1 supplement - mTORC1 and p62 in D1R-MSNs participate in the THC-induced impairment of motor coordination in vivo impairment of striatal autophagy and motor coordination in vivo. striatal autophagy and moto…
Figure 6A left panel - Motor coordination (time to fall, s)														Figure 6A right panel - c-myc-positive cells relative to total cells in the dorsal striatum							Figure 6A lower panel - pS6-positive cells relative to total cells in the dorsal striatum													Figure 6B left panel - Motor coordination (time to fall, s)														Figure 6B right panel - p62 fluorescence intensity relative to total cells in the dorsal striatum (arbitrary units)
Raw Data	Wild-type				D1R-Cre									Raw Data	Wild-type	D1R-Cre					Raw Data	Wild-type		D1R-Cre										Raw Data	Wild-type				D1R-Cre									Raw Data	Wild-type
	Vehicle		THC		Vehicle		THC								0.00397878	0.276534						vehicle	THC	vehicle	THC										Vehicle		THC		Vehicle		THC								1.01577
	Pre-treatment	Post-treatment	Pre-treatment	Post-treatment	Pre-treatment	Post-treatment	Pre-treatment	Post-treatment							0.00273598	0.285583						0.17321	0.282979	0.106137	0.0623819										Pre-treatment	Post-treatment	Pre-treatment	Post-treatment	Pre-treatment	Post-treatment	Pre-treatment	Post-treatment							0.978258
	117	186	77	48	152.3	172.7	130	167							0.00425532	0.267293						0.221723	0.464474	0.105601	0.0970441										132.222	152.667	97.6667	70.6667	64.4	86.6667	64.61	54							0.978258
	113.2	141.3	128.8	109.3	100.7	124	128.8	162.7							0.00588235	0.305992						0.161765	0.347059	0.0614859	0.0988836										161.556	172	99.3333	42	76.6	86	62.0822	92.6667							1.02772
	82.2	115	76.42	63.5	111.8	171.7	100.3	120						Mean	0.004213	0.2839						0.18836	0.403226	0.0851	0.117379										140.333	177.333	169.333	100.667	83.4	137.333	78.5633	135.333						Mean	1
	132.2	152.7	97.6667	70.6667	131.7	116.3	105.4	109.7						SD	0.001294	0.01654					Mean	0.1863	0.3744	0.08958	0.09392										95	104	131.111	86.6667	66.3	104	86.1467	62						SD	0.02558
	79.7	104	99.3333	42	102.2	94.3	142.2	102.7						SEM	0.0006471	0.008271					SD	0.02603	0.07757	0.02114	0.02294										85	102	145	117.333	70	118.667	94.9433	110						SEM	0.01279
Mean	104.9	139.8	95.84	66.69	119.7	135.8	121.3	132.4						CI	0.002154	0.2575					SEM	0.01301	0.03878	0.01057	0.01147									Mean	122.8	141.6	128.5	83.47	72.14	106.5	77.4	90.8						CI	0.9593
SD	22.97	32.4	21.41	26.46	22	34.97	17.77	30.28							0.006272	0.3102					CI	0.1448	0.251	0.05595	0.05741									SD	32.02	36.42	30.61	28.88	7.831	21.9	13.94	33.69							1.041
SEM	10.27	14.49	9.576	11.83	9.84	15.64	7.945	13.54														0.2277	0.4979	0.1232	0.1304									SEM	14.32	16.29	13.69	12.92	3.502	9.794	6.234	15.06
CI	76.34	99.57	69.26	33.84	92.42	92.38	99.28	94.83																										CI	83.07	96.38	90.48	47.61	62.42	79.34	60.09	48.97
	133.4	180	122.4	99.55	147.1	179.2	143.4	170																											162.6	186.8	166.5	119.3	81.86	133.7	94.71	132.6
Statistics														Statistics							Statistics													Statistics														Statistics
Two-way ANOVA		Ordinary												Unpaired t test							Two-way ANOVA		Ordinary											Two-way ANOVA		Ordinary												Unpaired t test
Alpha		0.05												P value			<0,0001				Alpha		0.05											Alpha		0.05												P value
														P value summary			****																															P value summary
Source of Variation		% of total variation	P value	P value summary		Significant?								Significantly different (P < 0.05)?			Yes				Source of Variation		% of total variation		P value	P value summary		Significant?						Source of Variation		% of total variation	P value	P value summary		Significant?								Significantly different (P < 0.05)?
Row Factor		15.58	0.035	*		Yes								One- or two-tailed P value?			Two-tailed				Row Factor		4.586	0.03	0.1109	ns		No						Row Factor		15.54	0.0311	*		Yes								One- or two-tailed P value?
Column Factor		48.14	0.0006	***		Yes								t, df			t=33,71, df=6				Column Factor		90.26	0.0015	<0,0001	****		Yes						Column Factor		49.42	0.0004	***		Yes								t, df
ANOVA table		SS	DF	MS	F (DFn, DFd)		P value							How big is the difference?							ANOVA table		SS	DF	MS	F (DFn, DFd)		P value						ANOVA table		SS	DF	MS	F (DFn, DFd)		P value							How big is the difference?
Row Factor		6822	4	1705	F (4, 28) = 3,007		P=0,0350							Mean of column WT (A)			0.004213				Row Factor		0.01083	3	0.003609	F (3, 9) = 2,668		P=0,1109						Row Factor		7365	4	1841	F (4, 28) = 3,105		P=0,0311							Mean of column WT (A)
Column Factor		21078	7	3011	F (7, 28) = 5,309		P=0,0006							Mean of column D1R-Cre (B)			0.2839				Column Factor		0.2131	3	0.07104	F (3, 9) = 52,52		P<0,0001						Column Factor		23415	7	3345	F (7, 28) = 5,641		P=0,0004							Mean of column D1R-Cre (B)
Residual		15881	28	567.2										Difference between means (B - A) ± SEM			0,2796 ± 0,008296				Residual		0.01217	9	0.001353									Residual		16605	28	593										Difference between means (B - A) ± SEM
R2		0.637263												95% confidence interval			0,2593 to 0,2999				R2		0.948454											R2		0.649573												95% confidence interval
														R squared (eta squared)			0.9947																															R squared (eta squared)
Two-way ANOVA (multiple comparisons)																					Two-way ANOVA (multiple comparisons)													Two-way ANOVA (multiple comparisons)
														F test to compare variances																																		F test to compare variances
Number of families			1	Power										F, DFn, Dfd			163,4, 3, 3				Number of families			1	Power									Number of families			1	Power										F, DFn, Dfd
Number of comparisons per family			28	0.7578										P value			0.0016				Number of comparisons per family			6	0.769									Number of comparisons per family			28	0.7255										P value
Alpha			0.05											P value summary			**				Alpha			0.05										Alpha			0.05											P value summary
														Significantly different (P < 0.05)?			Yes																															Significantly different (P < 0.05)?
Tukey's multiple comparisons test					Mean Diff,	95,00% CI of diff,	Significant?	Summary	Adjusted P Value												Tukey's multiple comparisons test			Mean Diff,	95,00% CI of diff,		Significant?	Summary	Adjusted P Value					Tukey's multiple comparisons test					Mean Diff,	95,00% CI of diff,		Significant?	Summary	Adjusted P Value
Vehicle Wild type (Pre-treatment) vs. Vehicle Wild type (Post-treatment)					-34.94	-84,20 to 14,32	No	ns	0.3185					Data analyzed			Power				Vehicle Wild type vs. THC Wild type			-0.1882	-0,2694 to -0,1070		Yes	***	0.0002					Vehicle Wild type (Pre-treatment) vs. Vehicle Wild type (Post-treatment)					-18.78	-69,14 to 31,59		No	ns	0.9193				Data analyzed
Vehicle Wild type (Pre-treatment) vs THC Wild type (Pre-treatment)			8.9514		9.016	-40,24 to 58,27	No	ns	0.9986					Sample size, column A		4	0.219				Vehicle Wild type vs Vehicle D1R-Cre			0.09668	0,01550 to 0,1779		Yes	*	0.0205					Vehicle Wild type (Pre-treatment) vs THC Wild type (Pre-treatment)			8.9514		-5.667	-56,03 to 44,70		No	ns	>0,9999				Sample size, column A
Vehicle Wild type (Pre-treatment) vs THC Wild type (Post-treatment)			8.9514		38.17	-11,09 to 87,42	No	ns	0.2227					Sample size, column B		4					Vehicle Wild type vs THC D1R-Cre			0.09234	0,01116 to 0,1735		Yes	*	0.0263					Vehicle Wild type (Pre-treatment) vs THC Wild type (Post-treatment)			8.9514		39.36	-11,01 to 89,72		No	ns	0.2144				Sample size, column B
Vehicle Wild type (Pre-treatment) vs Vehicle D1R-Cre (Basal)			8.9514		-14.88	-64,14 to 34,38	No	ns	0.9725												THC Wild type vs Vehicle D1R-Cre			0.2849	0,2037 to 0,3660		Yes	****	<0,0001					Vehicle Wild type (Pre-treatment) vs Vehicle D1R-Cre (Pre-treatment)			8.9514		50.68	0,3152 to 101,0		Yes	*	0.0477
Vehicle Wild type (Pre-treatment) vs Vehicle D1R-Cre (Post-treatment)			8.9514		-30.94	-80,20 to 18,32	No	ns	0.4664												THC Wild type vs THC D1R-Cre			0.2805	0,1993 to 0,3617		Yes	****	<0,0001					Vehicle Wild type (Pre-treatment) vs Vehicle D1R-Cre (Post-treatment)			8.9514		16.29	-34,08 to 66,66		No	ns	0.9604
Vehicle Wild type (Pre-treatment) vs THC D1R-Cre (Basal)					-16.48	-65,74 to 32,78	No	ns	0.9528												Vehicle D1R-Cre vs THC D1R-Cre			-0.004341	-0,08553 to 0,07684		No	ns	0.9982					Vehicle Wild type (Pre-treatment) vs THC D1R-Cre (Pre-treatment)					45.42	-4,945 to 95,79		No	ns	0.1002
Vehicle Wild type (Pre-treatment) vs THC D1R-Cre (Post-treatment)			8.9514		-27.56	-76,82 to 21,70	No	ns	0.6064																									Vehicle Wild type (Pre-treatment) vs THC D1R-Cre (Post-treatment)			8.9514		32.02	-18,34 to 82,39		No	ns	0.4514
Vehicle Wild type (Post-treatment) vs THC Wild type (Pre-treatment)			8.9514		43.96	-5,301 to 93,21	No	ns	0.1067												Test details			Mean 1	Mean 2	Mean Diff,	SE of diff,	N1	N2	q	DF			Vehicle Wild type (Post-treatment) vs THC Wild type (Pre-treatment)			8.9514		13.11	-37,26 to 63,48		No	ns	0.9881
Vehicle Wild type (Post-treatment) vs THC Wild type (Post-treatment)			8.9514		73.11	23,85 to 122,4	Yes	***	0.001												Vehicle Wild type vs. THC Wild type			0.1863	0.3744	-0.1882	0.02601	4	4	10.23	9			Vehicle Wild type (Post-treatment) vs THC Wild type (Post-treatment)			8.9514		58.13	7,766 to 108,5		Yes	*	0.0152
Vehicle Wild type (Post-treatment) vs Vehicle D1R-Cre (Pre-treatment)			8.9514		20.06	-29,20 to 69,32	No	ns	0.8788												Vehicle Wild type vs Vehicle D1R-Cre			0.1863	0.08958	0.09668	0.02601	4	4	5.258	9			Vehicle Wild type (Post-treatment) vs Vehicle D1R-Cre (Pre-treatment)			8.9514		69.46	19,09 to 119,8		Yes	**	0.0024
Vehicle Wild type (Post-treatment) vs Vehicle D1R-Cre (Post-treatment)			8.9514		4	-45,26 to 53,26	No	ns	>0,9999												Vehicle Wild type vs THC D1R-Cre			0.1863	0.09392	0.09234	0.02601	4	4	5.022	9			Vehicle Wild type (Post-treatment) vs Vehicle D1R-Cre (Post-treatment)			8.9514		35.07	-15,30 to 85,43		No	ns	0.3404
Vehicle Wild type (Post-treatment) vs THC D1R-Cre (Pre-treatment)			8.9514		18.46	-30,80 to 67,72	No	ns	0.9173												THC Wild type vs Vehicle D1R-Cre			0.3744	0.08958	0.2849	0.02601	4	4	15.49	9			Vehicle Wild type (Post-treatment) vs THC D1R-Cre (Pre-treatment)			8.9514		64.2	13,83 to 114,6		Yes	**	0.0057
Vehicle Wild type (Post-treatment) vs THC D1R-Cre (Post-treatment)			8.9514		7.38	-41,88 to 56,64	No	ns	0.9996												THC Wild type vs THC D1R-Cre			0.3744	0.09392	0.2805	0.02601	4	4	15.25	9			Vehicle Wild type (Post-treatment) vs THC D1R-Cre (Post-treatment)			8.9514		50.8	0,4330 to 101,2		Yes	*	0.0469
THC Wild type (Pre-treatment) vs THC Wild type (Post-treatment)			8.9514		29.15	-20,11 to 78,41	No	ns	0.5398												Vehicle D1R-Cre vs THC D1R-Cre			0.08958	0.09392	-0.004341	0.02601	4	4	0.2361	9			THC Wild type (Pre-treatment) vs THC Wild type (Post-treatment)			8.9514		45.02	-5,345 to 95,39		No	ns	0.1057
THC Wild type (Pre-treatment) vs Vehicle D1R-Cre (Pre-treatment)			8.9514		-23.9	-73,15 to 25,36	No	ns	0.754																									THC Wild type (Pre-treatment) vs Vehicle D1R-Cre (Pre-treatment)			8.9514		56.35	5,982 to 106,7		Yes	*	0.0202
THC Wild type (Pre-treatment) vs Vehicle D1R-Cre (Post-treatment)			8.9514		-39.96	-89,21 to 9,301	No	ns	0.1796																									THC Wild type (Pre-treatment) vs Vehicle D1R-Cre (Post-treatment)			8.9514		21.96	-28,41 to 72,32		No	ns	0.8379
THC Wild type (Pre-treatment) vs THC D1R-Cre (Pre-treatment)			8.9514		-25.5	-74,75 to 23,76	No	ns	0.6916																									THC Wild type (Pre-treatment) vs THC D1R-Cre (Pre-treatment)			8.9514		51.09	0,7219 to 101,5		Yes	*	0.045
THC Wild type (Pre-treatment) vs THC D1R-Cre (Post-treatment)			8.9514		-36.58	-85,83 to 12,68	No	ns	0.267																									THC Wild type (Pre-treatment) vs THC D1R-Cre (Post-treatment)			8.9514		37.69	-12,68 to 88,06		No	ns	0.2588
THC Wild type (Post-treatment) vs Vehicle D1R-Cre (Pre-treatment)			8.9514		-53.05	-102,3 to -3,790	Yes	*	0.028																									THC Wild type (Post-treatment) vs Vehicle D1R-Cre (Pre-treatment)			8.9514		11.33	-39,04 to 61,69		No	ns	0.995
THC Wild type (Post-treatment) vs Vehicle D1R-Cre (post-treatment)			8.9514		-69.11	-118,4 to -19,85	Yes	**	0.0019																									THC Wild type (Post-treatment) vs Vehicle D1R-Cre (post-treatment)			8.9514		-23.07	-73,43 to 27,30		No	ns	0.8022
THC Wild type (Post-treatment) vs THC D1R-Cre (Pre-treatment)			8.9514		-54.65	-103,9 to -5,390	Yes	*	0.0217																									THC Wild type (Post-treatment) vs THC D1R-Cre (Pre-treatment)			8.9514		6.067	-44,30 to 56,43		No	ns	>0,9999
THC Wild type (Post-treatment) vs THC D1R-Cre (Post-treatment)			8.9514		-65.73	-115,0 to -16,47	Yes	**	0.0034																									THC Wild type (Post-treatment) vs THC D1R-Cre (Post-treatment)			8.9514		-7.333	-57,70 to 43,03		No	ns	0.9997
Vehicle D1R-Cre (Pre-treatment) vs Vehicle D1R-Cre (Post-treatment)			8.9514		-16.06	-65,32 to 33,20	No	ns	0.9587																									Vehicle D1R-Cre (Pre-treatment) vs Vehicle D1R-Cre (Post-treatment)			8.9514		-34.39	-84,76 to 15,97		No	ns	0.3635
Vehicle D1R-Cre (Pre-treatment) vs THC D1R-Cre (Pre-treatment)			8.9514		-1.6	-50,86 to 47,66	No	ns	>0,9999																									Vehicle D1R-Cre (Pre-treatment) vs THC D1R-Cre (Pre-treatment)			8.9514		-5.26	-55,63 to 45,11		No	ns	>0,9999
Vehicle D1R-Cre (Pre-treatment) vs THC D1R-Cre (Post-treatment)			8.9514		-12.68	-61,94 to 36,58	No	ns	0.9888																									Vehicle D1R-Cre (Pre-treatment) vs THC D1R-Cre (Post-treatment)			8.9514		-18.66	-69,03 to 31,71		No	ns	0.9217
Vehicle D1R-Cre (Post-treatment) vs THC D1R-Cre (Pre-treatment)			8.9514		14.46	-34,80 to 63,72	No	ns	0.9765																									Vehicle D1R-Cre (Post-treatment) vs THC D1R-Cre (Pre-treatment)			8.9514		29.13	-21,23 to 79,50		No	ns	0.5674
Vehicle D1R-Cre (Post-treatment) vs THC D1R-Cre (Post-treatment)			8.9514		3.38	-45,88 to 52,64	No	ns	>0,9999																									Vehicle D1R-Cre (Post-treatment) vs THC D1R-Cre (Post-treatment)			8.9514		15.73	-34,63 to 66,10		No	ns	0.9671
THC D1R-Cre (Pre-treatment) vs THC D1R-Cre (Post-treatment)			8.9514		-11.08	-60,34 to 38,18	No	ns	0.995																									THC D1R-Cre (Pre-treatment) vs THC D1R-Cre (Post-treatment)			8.9514		-13.4	-63,77 to 36,97		No	ns	0.9865
Test details					Mean 1	Mean 2	Mean Diff,	SE of diff,	n1	n2	q	DF																						Test details					Mean 1	Mean 2	Mean Diff,	SE of diff,	n1	n2	q	DF
Vehicle Wild type (Pre-treatment) vs. Vehicle Wild type (Post-treatment)					104.9	139.8	-34.94	15.06	5	5	3.281	28																						Vehicle Wild type (Pre-treatment) vs. Vehicle Wild type (Post-treatment)					122.8	141.6	-18.78	15.4	5	5	1.724	28
Vehicle Wild type (Pre-treatment) vs THC Wild type (Pre-treatment)			8.9514		104.9	95.84	9.016	15.06	5	5	0.8465	28																						Vehicle Wild type (Pre-treatment) vs THC Wild type (Pre-treatment)			8.9514		122.8	128.5	-5.667	15.4	5	5	0.5203	28
Vehicle Wild type (Pre-treatment) vs THC Wild type (Post-treatment)			8.9514		104.9	66.69	38.17	15.06	5	5	3.584	28																						Vehicle Wild type (Pre-treatment) vs THC Wild type (Post-treatment)			8.9514		122.8	83.47	39.36	15.4	5	5	3.614	28
Vehicle Wild type (Pre-treatment) vs Vehicle D1R-Cre (Basal)			8.9514		104.9	119.7	-14.88	15.06	5	5	1.397	28																						Vehicle Wild type (Pre-treatment) vs Vehicle D1R-Cre (Pre-treatment)			8.9514		122.8	72.14	50.68	15.4	5	5	4.654	28
Vehicle Wild type (Pre-treatment) vs Vehicle D1R-Cre (Post-treatment)			8.9514		104.9	135.8	-30.94	15.06	5	5	2.905	28																						Vehicle Wild type (Pre-treatment) vs Vehicle D1R-Cre (Post-treatment)			8.9514		122.8	106.5	16.29	15.4	5	5	1.496	28
Vehicle Wild type (Pre-treatment) vs THC D1R-Cre (Basal)					104.9	121.3	-16.48	15.06	5	5	1.547	28																						Vehicle Wild type (Pre-treatment) vs THC D1R-Cre (Pre-treatment)					122.8	77.4	45.42	15.4	5	5	4.171	28
Vehicle Wild type (Pre-treatment) vs THC D1R-Cre (Post-treatment)			8.9514		104.9	132.4	-27.56	15.06	5	5	2.588	28																						Vehicle Wild type (Pre-treatment) vs THC D1R-Cre (Post-treatment)			8.9514		122.8	90.8	32.02	15.4	5	5	2.94	28
Vehicle Wild type (Post-treatment) vs THC Wild type (Pre-treatment)			8.9514		139.8	95.84	43.96	15.06	5	5	4.127	28																						Vehicle Wild type (Post-treatment) vs THC Wild type (Pre-treatment)			8.9514		141.6	128.5	13.11	15.4	5	5	1.204	28
Vehicle Wild type (Post-treatment) vs THC Wild type (Post-treatment)			8.9514		139.8	66.69	73.11	15.06	5	5	6.864	28																						Vehicle Wild type (Post-treatment) vs THC Wild type (Post-treatment)			8.9514		141.6	83.47	58.13	15.4	5	5	5.338	28
Vehicle Wild type (Post-treatment) vs Vehicle D1R-Cre (Pre-treatment)			8.9514		139.8	119.7	20.06	15.06	5	5	1.883	28																						Vehicle Wild type (Post-treatment) vs Vehicle D1R-Cre (Pre-treatment)			8.9514		141.6	72.14	69.46	15.4	5	5	6.378	28
Vehicle Wild type (Post-treatment) vs Vehicle D1R-Cre (Post-treatment)			8.9514		139.8	135.8	4	15.06	5	5	0.3756	28																						Vehicle Wild type (Post-treatment) vs Vehicle D1R-Cre (Post-treatment)			8.9514		141.6	106.5	35.07	15.4	5	5	3.22	28
Vehicle Wild type (Post-treatment) vs THC D1R-Cre (Pre-treatment)			8.9514		139.8	121.3	18.46	15.06	5	5	1.733	28																						Vehicle Wild type (Post-treatment) vs THC D1R-Cre (Pre-treatment)			8.9514		141.6	77.4	64.2	15.4	5	5	5.895	28
Vehicle Wild type (Post-treatment) vs THC D1R-Cre (Post-treatment)			8.9514		139.8	132.4	7.38	15.06	5	5	0.6929	28																						Vehicle Wild type (Post-treatment) vs THC D1R-Cre (Post-treatment)			8.9514		141.6	90.8	50.8	15.4	5	5	4.665	28
THC Wild type (Pre-treatment) vs THC Wild type (Post-treatment)			8.9514		95.84	66.69	29.15	15.06	5	5	2.737	28																						THC Wild type (Pre-treatment) vs THC Wild type (Post-treatment)			8.9514		128.5	83.47	45.02	15.4	5	5	4.134	28
THC Wild type (Pre-treatment) vs Vehicle D1R-Cre (Pre-treatment)			8.9514		95.84	119.7	-23.9	15.06	5	5	2.244	28																						THC Wild type (Pre-treatment) vs Vehicle D1R-Cre (Pre-treatment)			8.9514		128.5	72.14	56.35	15.4	5	5	5.174	28
THC Wild type (Pre-treatment) vs Vehicle D1R-Cre (Post-treatment)			8.9514		95.84	135.8	-39.96	15.06	5	5	3.752	28																						THC Wild type (Pre-treatment) vs Vehicle D1R-Cre (Post-treatment)			8.9514		128.5	106.5	21.96	15.4	5	5	2.016	28
THC Wild type (Pre-treatment) vs THC D1R-Cre (Pre-treatment)			8.9514		95.84	121.3	-25.5	15.06	5	5	2.394	28																						THC Wild type (Pre-treatment) vs THC D1R-Cre (Pre-treatment)			8.9514		128.5	77.4	51.09	15.4	5	5	4.691	28
THC Wild type (Pre-treatment) vs THC D1R-Cre (Post-treatment)			8.9514		95.84	132.4	-36.58	15.06	5	5	3.434	28																						THC Wild type (Pre-treatment) vs THC D1R-Cre (Post-treatment)			8.9514		128.5	90.8	37.69	15.4	5	5	3.461	28
THC Wild type (Post-treatment) vs Vehicle D1R-Cre (Pre-treatment)			8.9514		66.69	119.7	-53.05	15.06	5	5	4.981	28																						THC Wild type (Post-treatment) vs Vehicle D1R-Cre (Pre-treatment)			8.9514		83.47	72.14	11.33	15.4	5	5	1.04	28
THC Wild type (Post-treatment) vs Vehicle D1R-Cre (post-treatment)			8.9514		66.69	135.8	-69.11	15.06	5	5	6.489	28																						THC Wild type (Post-treatment) vs Vehicle D1R-Cre (post-treatment)			8.9514		83.47	106.5	-23.07	15.4	5	5	2.118	28
THC Wild type (Post-treatment) vs THC D1R-Cre (Pre-treatment)			8.9514		66.69	121.3	-54.65	15.06	5	5	5.131	28																						THC Wild type (Post-treatment) vs THC D1R-Cre (Pre-treatment)			8.9514		83.47	77.4	6.067	15.4	5	5	0.5571	28
THC Wild type (Post-treatment) vs THC D1R-Cre (Post-treatment)			8.9514		66.69	132.4	-65.73	15.06	5	5	6.171	28																						THC Wild type (Post-treatment) vs THC D1R-Cre (Post-treatment)			8.9514		83.47	90.8	-7.333	15.4	5	5	0.6734	28
Vehicle D1R-Cre (Pre-treatment) vs Vehicle D1R-Cre (Post-treatment)			8.9514		119.7	135.8	-16.06	15.06	5	5	1.508	28																						Vehicle D1R-Cre (Pre-treatment) vs Vehicle D1R-Cre (Post-treatment)			8.9514		72.14	106.5	-34.39	15.4	5	5	3.158	28
Vehicle D1R-Cre (Pre-treatment) vs THC D1R-Cre (Pre-treatment)			8.9514		119.7	121.3	-1.6	15.06	5	5	0.1502	28																						Vehicle D1R-Cre (Pre-treatment) vs THC D1R-Cre (Pre-treatment)			8.9514		72.14	77.4	-5.26	15.4	5	5	0.483	28
Vehicle D1R-Cre (Pre-treatment) vs THC D1R-Cre (Post-treatment)			8.9514		119.7	132.4	-12.68	15.06	5	5	1.191	28																						Vehicle D1R-Cre (Pre-treatment) vs THC D1R-Cre (Post-treatment)			8.9514		72.14	90.8	-18.66	15.4	5	5	1.713	28
Vehicle D1R-Cre (Post-treatment) vs THC D1R-Cre (Pre-treatment)			8.9514		135.8	121.3	14.46	15.06	5	5	1.358	28																						Vehicle D1R-Cre (Post-treatment) vs THC D1R-Cre (Pre-treatment)			8.9514		106.5	77.4	29.13	15.4	5	5	2.675	28
Vehicle D1R-Cre (Post-treatment) vs THC D1R-Cre (Post-treatment)			8.9514		135.8	132.4	3.38	15.06	5	5	0.3174	28																						Vehicle D1R-Cre (Post-treatment) vs THC D1R-Cre (Post-treatment)			8.9514		106.5	90.8	15.73	15.4	5	5	1.445	28
THC D1R-Cre (Pre-treatment) vs THC D1R-Cre (Post-treatment)			8.9514		121.3	132.4	-11.08	15.06	5	5	1.04	28																						THC D1R-Cre (Pre-treatment) vs THC D1R-Cre (Post-treatment)			8.9514		77.4	90.8	-13.4	15.4	5	5	1.23	28
[truncated: 2 more columns]

## Sheet: Figure 6 supplement 1
Figure 6-figure supplement 1 - THC activates the mTORC1 pathway in D1R-MSNs but not D2R-MSNs in vivo
Supplement 1 - Immunofluorescence of pS6 in the dorsal striatum (pS6+ DxR+ cells / total DxR+ cells) analysis of pS6 in the dorsal striatum
Raw Data	D1R group		D2R group
	Vehicle	THC	Vehicle	THC
	0.176	0.201	0.184	0.166
	0.208	0.217	0.182171	0.259
	0.118	0.331	0.195	0.128
	0.154	0.360947	0.185	0.104
	0.198895	0.364641	0.171	0.289
	0.232082	0.429907	0.177778	0.237226
Mean	0.1812	0.3174	0.1825	0.1972
SD	0.04094	0.09011	0.007993	0.07523
SEM	0.01671	0.03679	0.003263	0.03071
CI	0.1382	0.2229	0.1741	0.1183
	0.2241	0.412	0.1909	0.2762
Statistics
Two-way ANOVA		Ordinary
Alpha		0.05
Source of Variation		% of total variation		P value	P value summary		Significant?
Row Factor		16.19		0.2683	ns		No
Column Factor		49.98		0.0029	**		Yes
ANOVA table		SS	DF	MS	F (DFn, DFd)		P value
Row Factor		0.02511	5	0.005022	F (5, 15) = 1,435		P=0,2683
Column Factor		0.07754	3	0.02585	F (3, 15) = 7,387		P=0,0029
Residual		0.05249	15	0.003499
R2		0.66166
Two-way ANOVA (multiple comparisons)
Number of families			1	Power
Number of comparisons per family			6	0.6916
Alpha			0.05
Tukey's multiple comparisons test				Mean Diff,	95,00% CI of diff,		Significant?	Summary	Adjusted P Value
Vehicle D1R group vs. THC D1R group				-0.1363	-0,2347 to -0,03782		Yes	**	0.0058
Vehicle D1R group vs. Vehicle D2R group				-0.001329	-0,09976 to 0,09710		No	ns	>0,9999
Vehicle D1R group vs. THC D2R group				-0.01604	-0,1145 to 0,08239		No	ns	0.9646
THC D1R group vs. Vehicle D2R group				0.1349	0,03649 to 0,2334		Yes	**	0.0063
THC D1R group vs. THC D2R group				0.1202	0,02178 to 0,2186		Yes	*	0.0146
Vehicle D2R group vs. THC D2R group				-0.01471	-0,1131 to 0,08372		No	ns	0.9723
Test details				Mean 1	Mean 2	Mean Diff,	SE of diff,	N1	N2	q	DF
Vehicle D1R group vs. THC D1R group				0.1812	0.3174	-0.1363	0.03415	6	6	5.642	15
Vehicle D1R group vs. Vehicle D2R group				0.1812	0.1825	-0.001329	0.03415	6	6	0.05501	15
Vehicle D1R group vs. THC D2R group				0.1812	0.1972	-0.01604	0.03415	6	6	0.6643	15
THC D1R group vs. Vehicle D2R group				0.3174	0.1825	0.1349	0.03415	6	6	5.587	15
THC D1R group vs. THC D2R group				0.3174	0.1972	0.1202	0.03415	6	6	4.978	15
Vehicle D2R group vs. THC D2R group				0.1825	0.1972	-0.01471	0.03415	6	6	0.6092	15
